# Supplementary material for: HIV testing among female sex workers and associated factors in Burkina Faso: findings from a respondent-driven sampling survey
Source: PubMed Central journal article supplement — BMC Public Health. 2024 Sep 16;24:2512. doi: 10.1186/s12889-024-19977-7 (PMC11403936; doi:10.1186/s12889-024-19977-7), 2024-09-16
Supplement: 12889_2024_19977_MOESM1_ESM.pdf [file 12889_2024_19977_MOESM1_ESM.pdf]

BURKINA FASO

-----  
CENTRE NATIONAL DE RECHERCHE SCIENTIFIQUE ET TECHNOLOGIQUE (CNRST)  
-----

**Institut de Recherche en Sciences de la Santé (IRSS)**

-----  
**Biomedical and Public Health Department**

*HIV and Reproductive Health Research Unit*

-----  
03 BP 7192 Ouagadougou 03

Tel: +226 25 33 56 84 / +226 25 36 32 15  
-----

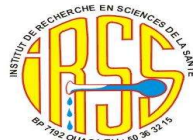

**PROGRAMMATIC MAPPING, SIZE ESTIMATION, AND HIV  
BIOBEHAVIORAL STUDY AMONG KEY POPULATIONS IN BURKINA  
FASO, 2021**

*Questionnaire SEX WORKERS  
Burkina Faso 2021*

January 2021

## Sex Workers-Burkina Faso 2021

|                                        | CODES                                         |
|----------------------------------------|-----------------------------------------------|
| Questionnaire number                   | _1_ _1_ _2_ _0_ _8_ _0_ _0_ _2_  <sup>1</sup> |
| Region                                 | _ _                                           |
| Province                               | _ _                                           |
| Department                             | _ _                                           |
| Village/District/Sector                | _ _                                           |
| Survey Site                            | _ _                                           |
| Investigator                           | _ _                                           |
| Date of Investigation                  | _T_ _J_ - _M_ _M_ - _A_ _A_ _A_ _A_           |
| Supervisor                             | _ _                                           |
| Supervisor Control Date and Validation | _T_ _J_ - _M_ _M_ - _A_ _A_ _A_ _A_           |
| Record Validation Date                 | _T_ _J_ - _M_ _M_ - _A_ _A_ _A_ _A_           |

<sup>1</sup> 1=TS, 12=region N°12, 08=Interviewer number, 002=Participant N°

**Information Required for All POTENTIALLY ELIGIBLE PERSONS**

Day   Month   Year   Investigator ID

**Unique ID (Attach Label)**

|   |   |   |   |   |   |   |   |   |   |
|---|---|---|---|---|---|---|---|---|---|
|   |   |   |   |   |   |   |   |   |   |
| L | L | L | L | N | N | N | N | L | L |

\*L= Letter  
 N= Number  
 Example: AAAA0101AA

1. What are the first two letters of the city/village where you were born? (LL)
2. What are the first two letters of the month in which you were born? (LL)
3. How many living brothers of the same mother do you have? (if "one", the number entered will be "01", if "zero", the number entered will be "00") (NN)
4. How many living sisters of the same mother do you have? (if "one", the number entered will be "01", if "zero", the number entered will be "00") (NN)
5. What are the first two letters of the neighbourhood (neighbourhood) you live in? (LL)

ID du Coupon

**ELIGIBILITY VERIFICATION**

*Investigator: You must ask and record any eligibility questions*

Has. **How old are you?** [Age in completed years]

[Under 15 years of age = Not eligible; 15 years of age or older = eligible]

**B. Are you born female?**

**01=No** [not eligible]  
**02=Yes** [eligible]

**C. Have you participated in this study with a coupon in the last 6 months?**

01=Not [eligible]  
 02= Yes [not eligible]

**D. In the last 12 months, have you earned the majority of your income from sex work?**

**01=No** [not eligible]  
**02=Yes** [eligible]

[Interviewer: Read the consent form if the participant is eligible to date]

**E. Based on what we discussed during the consent process, are you willing to participate in this study?**

01= No [not eligible (End of interview)]  
 02=Yes [eligible (continue with the survey)]

[INVESTIGATOR ONLY]

[Note to interviewer: From the above questions, if the person is not eligible based on the criteria, write "No" (02) in question F and thank them for their time.]

[If this person is eligible, based on their answers to questions A-E, but you believe that they have already participated in the study or, for any other reason, are not eligible, please enter "no" ("02") below and complete the following questions (F-J). Then, end the interview in the same way as with other ineligible participants. Use your best discretion.]

F. Is the person eligible?

|  |  |
|--|--|
|  |  |
|--|--|

01= Eligible [continue with the survey starting with question K]

02= Not eligible [answer questions G-J, and then end the survey]

G. Is the person ineligible because he or she is under the influence of alcohol or other drugs?

|  |  |
|--|--|
|  |  |
|--|--|

01= No

02= Yes

H. Is the person ineligible because he or she does not have the mental capacity to give informed consent or to answer the questions in the survey?

|  |  |
|--|--|
|  |  |
|--|--|

01= No

02= Yes

I. Is the person ineligible because you believe they have participated in the study before (even if they said "no" to question C)?

|  |  |
|--|--|
|  |  |
|--|--|

01= No

02= Yes

J. Is the person ineligible for any other reason not identified above? If so, please specify the reason(s).

|  |  |
|--|--|
|  |  |
|--|--|

01= No

02= Yes

## Estimating the size of key populations

### Q001-Size of the personal network (degree)

A. How many different people do you know personally who are sex workers? (That is, people you've been in contact with in the last 2 years and who you could contact now if you want.) [Note the number of women]

|  |  |  |  |  |
|--|--|--|--|--|
|  |  |  |  |  |
|--|--|--|--|--|

B. Of these (from question K), how many people have you actually seen or talked about at *least once* in the past 6 months? [Note the number of men]

|  |  |  |  |  |
|--|--|--|--|--|
|  |  |  |  |  |
|--|--|--|--|--|

C. Of these sex workers, how many have you actually seen or talked about at least once in the past week (the last 7 days)? [Note the number of men]

|  |  |  |  |  |
|--|--|--|--|--|
|  |  |  |  |  |
|--|--|--|--|--|

### **Q002-Multi-Purpose**

A-Have you received (*show the unique item*) before?

|  |  |
|--|--|
|  |  |
|--|--|

01= No [go to question Q003]

02= Yes

B. From whom did you receive the object ?

|  |  |
|--|--|
|  |  |
|--|--|

01= Peer educator

02=Member of a community organization

03= Someone else

C. Where did you receive this item?

|  |  |
|--|--|
|  |  |
|--|--|

01= In Ouagadougou

02= A Bobo Dioulasso

03= In Koudougou

04= In Ouahigouya

05= In Tenkogogo

06= In none of these localities

### **Q003-The "Wisdom of the Masses" method**

In your opinion, how many sex workers live in Ouagadougou (or Bobo Dioulasso)? Please give your best guess. There is no incorrect answer. [Note the number of TSs]

|  |  |  |  |  |
|--|--|--|--|--|
|  |  |  |  |  |
|--|--|--|--|--|

## SECTION 1A: GENERAL CHARACTERISTICS

| No.  | Question                                                | Coding                                                                                                                                                                                                                                                                                                            | Answer | Jumps                           |
|------|---------------------------------------------------------|-------------------------------------------------------------------------------------------------------------------------------------------------------------------------------------------------------------------------------------------------------------------------------------------------------------------|--------|---------------------------------|
| 101  | In which country were you born?                         | 01= Burkina Faso<br>02= Ghana<br>03= Benin<br>04= Togo<br>05= Ivory Coast<br>06= Nigeria<br>07= Cameroon<br>08= Other (specify)<br>Specify: _____<br><br>88= Refusal<br>99= Don't know                                                                                                                            |        |                                 |
| 102  | What was the last class you reached?                    | 01= No level<br>02= Has not attended mainstream school<br>03= Incomplete primary school<br>04= Complete primary<br>05= Incomplete secondary<br>06= Full secondary<br>07= University<br>08 = Koranic school<br>08=Franco-Arab School<br>09= Other (specify)<br>Specify: _____<br><br>88= Refusal<br>99= Don't know |        |                                 |
| 103  | What is your current occupation? (apart from sex work)  | 01= Unemployed<br>02= Liberal profession<br>03= Employee (private or public)<br>04= Student<br>05= Informal sector<br>06= Other<br>Specify: _____<br><br>88= Refusal<br>99= Don't know                                                                                                                            |        |                                 |
| 104  | What is your current marital status?                    | 01= Single<br>02= Married/living with a partner<br>03=Divorced/Separated<br>04= Widow<br>06= Other (specify)<br>Specify: _____<br><br>88= Refusal<br>99= Don't know                                                                                                                                               |        | SI 01, 88 or 99, change to 106a |
| 105  | How old were you when you first got married?            | Age in Completed Years                                                                                                                                                                                                                                                                                            |        |                                 |
| 106a | At what age did you have your first sexual intercourse? | Age in completed years<br>88 = Don't remember<br>99 = Non-response                                                                                                                                                                                                                                                |        |                                 |

|      |                                                                                                                                         |                                                                                                                                                                          |                  |  |
|------|-----------------------------------------------------------------------------------------------------------------------------------------|--------------------------------------------------------------------------------------------------------------------------------------------------------------------------|------------------|--|
| 106b | How old were you the first time you had sex for money?                                                                                  | Age in completed years<br>88 = Don't call me back<br>99 = No response                                                                                                    | _ _ _            |  |
| 107  | How long have you been having sex and receiving money?                                                                                  | Number of Months<br>Number of years<br>88 = Don't call me back<br>99 = No response                                                                                       | _ _ _ <br> _ _ _ |  |
| 108  | On average, how much FCFA do you earn per week? This includes income from formal and informal work, and sex work as well as other jobs. | <i>[Write down the weekly income in FCFA]</i><br>88= Refusal<br>99= Don't know                                                                                           | _____            |  |
| 109  | On average, how much FCFA do you earn per week from sex work?                                                                           | <i>[Legibly note the weekly income in FCFA]</i><br>88= Refusal<br>99= Don't know                                                                                         | _____            |  |
| 110  | In the <u>last 6 months</u> , how many cities or towns have you lived in?                                                               | <i>[Note the number of towns or villages. Write 00 if she has not moved and has lived in a single city/towns for the last 6 months]</i><br>88= Refusal<br>99= Don't know | _ _ _            |  |
| 111  | Approximately how many years have you lived in Burkina Faso?                                                                            | <i>[Note the number of years. Write 00 if less than one year old.]</i><br>88= Refusal<br>99= Don't know                                                                  | _ _ _            |  |
| 112  | How many biological children do you have? (not adopted)                                                                                 | <i>[Note the number of children. Write 00 if no children]</i><br>88= Refusal<br>99= Don't know                                                                           | _ _ _            |  |
| 113  | Are you a member of a sex worker support association?                                                                                   | 01 = No<br>02 = Yes (specify)<br>Specify:<br><br>88= Refusal<br>99= Don't know                                                                                           | _ _ _            |  |

**Section 2: LIFESTYLE HABITS IN RELATION TO ALCOHOL AND DRUGS**

|      |                                                                                                                                                                              |                                                                                                                                                                                                                                                                                                                                                                                  |                                                                                                                                                                                                  |                              |
|------|------------------------------------------------------------------------------------------------------------------------------------------------------------------------------|----------------------------------------------------------------------------------------------------------------------------------------------------------------------------------------------------------------------------------------------------------------------------------------------------------------------------------------------------------------------------------|--------------------------------------------------------------------------------------------------------------------------------------------------------------------------------------------------|------------------------------|
| Q201 | In the past two (2) months, have you read a newspaper or magazine?                                                                                                           | 1 = Yes<br>2 = No<br>9 = No response                                                                                                                                                                                                                                                                                                                                             | <input type="checkbox"/>                                                                                                                                                                         |                              |
| Q202 | In the past four weeks, have you been drinking alcoholic beverages?                                                                                                          | 1 = Yes<br>2 = No<br>9 = No response                                                                                                                                                                                                                                                                                                                                             | <input type="checkbox"/>                                                                                                                                                                         | <b>If 2 or 9 go to Q110B</b> |
| Q203 | In the last 4 weeks, how many times have you drunk alcoholic beverages? Was it....<br><br><b>Read all terms and conditions<br/>Only one answer</b>                           | 1 = Daily<br>2 = At least once a week<br>3 = Less than once a week<br>8 = Don't know<br>9 = Non-response                                                                                                                                                                                                                                                                         | <input type="checkbox"/>                                                                                                                                                                         |                              |
| Q204 | Some people have tried to use certain drugs. Have you tried any?                                                                                                             | 1 = Yes<br>2 = No<br>9 = No response                                                                                                                                                                                                                                                                                                                                             | <input type="checkbox"/>                                                                                                                                                                         | <b>If 2 or 9 go to Q201</b>  |
| Q205 | Which of the following drugs have you tried?<br><br><i>Read the terms and conditions, write '1' each time an answer is quoted</i><br><br><b>Several answers are possible</b> | a) Indian Hemp<br>(b) Amphetamines<br>(c) Cocaine<br>(d) Heroin<br>(e) Dissolution<br>(f) Crack<br>(g) Traditional Potion<br>(h) Other<br>_____                                                                                                                                                                                                                                  | <input type="checkbox"/><br><input type="checkbox"/><br><input type="checkbox"/><br><input type="checkbox"/><br><input type="checkbox"/><br><input type="checkbox"/><br><input type="checkbox"/> |                              |
| Q206 | How do you use this drug(s)?                                                                                                                                                 | Cocaine Heroin Crack<br>Oral <input type="checkbox"/> <input type="checkbox"/> <input type="checkbox"/><br>Injection <input type="checkbox"/> <input type="checkbox"/> <input type="checkbox"/><br>Sniff <input type="checkbox"/> <input type="checkbox"/> <input type="checkbox"/><br>Smokes/inhales <input type="checkbox"/> <input type="checkbox"/> <input type="checkbox"/> |                                                                                                                                                                                                  |                              |

SECTION 3: SEXUAL ACTIVITY

"Now I would like to discuss your sexual behaviors. When I mention "sex" I mean vaginal or anal intercourse, unless otherwise specified. When I mention "condoms", I am usually referring to male *and* female condoms. In addition, unless otherwise stated, I am referring to a new condom for each sexual act with each sexual partner and I mean that the condom was used during the entire penetrative sexual act. »

|                                                                |                                                                                 |                                                                     |                                                                            |  |
|----------------------------------------------------------------|---------------------------------------------------------------------------------|---------------------------------------------------------------------|----------------------------------------------------------------------------|--|
| <b>Now think about the sex work you are currently doing...</b> |                                                                                 |                                                                     |                                                                            |  |
| 301                                                            | On average, how many customers do you have<br>Every night or day that you work? | [Note the number of customers]<br><br>88= Refusal<br>99= Don't know | <input type="checkbox"/> <input type="checkbox"/> <input type="checkbox"/> |  |
|                                                                | On average, how many days per month                                             | [Note the number of days]                                           | <input type="checkbox"/> <input type="checkbox"/> <input type="checkbox"/> |  |



|     |                                                                                                                |                                                                                                                  |  |                                           |
|-----|----------------------------------------------------------------------------------------------------------------|------------------------------------------------------------------------------------------------------------------|--|-------------------------------------------|
| 302 | Do you do sex work?                                                                                            | 88= Refusal<br>99= Don't know                                                                                    |  |                                           |
| 303 | In a normal week, how many men have you had sex with? (including non-paying clients and sex partners)          | [Note the number of men]<br><br>88= Refusal<br>99= Don't know                                                    |  |                                           |
| 304 | In the last 6 months, have you had vaginal sex ?                                                               | 01= No<br>02= Yes<br><br>88= Refusal<br>99= Don't know                                                           |  | If 01, 88 or 99, switch to Q306           |
| 305 | Of the times you have had vaginal sex in the past 6 months, how often have you had vaginal sex? used a condom? | 01= Never<br>02= Almost never<br>03= Sometimes<br>04= Often<br>05= Always<br><br>88= Refusal<br>99= Don't know   |  |                                           |
| 306 | In the past 6 months, have you had anal sex?                                                                   | 01= No<br>02= Yes<br><br>88= Refusal                                                                             |  | SI 01, 88 or 99, switch to Q308           |
| 307 | Among the times you have had anal intercourse during the 6 months, how often have you used a condom?           | 01= Never<br>02= Almost never<br>03= Sometimes<br>04= Often<br>05= Always<br>88= Refusal<br>99= Don't know       |  |                                           |
| 308 | In the past 6 months, have you had oral sex?                                                                   | 01= No<br>02= Yes<br><br>88= Refusal<br>99= Don't know                                                           |  | SI 01, 88 or 99, skip to the next section |
| 309 | Of the times you've had oral sex in the past 6 months, how often have you used a condom?                       | 01= Never<br>02= Almost never<br>03= A few times<br>04= Often<br>05= Always<br><br>88= Refusal<br>99= Don't know |  |                                           |

#### SECTION 4 - PARTNERS AND CLIENTS

"I'm going to ask about people who give you money in exchange for sex. I'm going to call these people "clients." In addition, I will ask about your non-paying sexual partners. Non-paying sex partners are those with whom you have sex but are not customers and therefore do not pay you in exchange for those relationships. This could include sexual partners you live with, a boyfriend or girlfriend (with whom you have sex), and a husband (who doesn't pay you). In addition, this category can include casual partners with whom you have sex to please yourself, without any payment. »

| No. | Question                                                                                                                                                                                          | Answers | Codes | Jumps |
|-----|---------------------------------------------------------------------------------------------------------------------------------------------------------------------------------------------------|---------|-------|-------|
| 401 | Where do you usually advertise or meet with your clients to negotiate reports? Sexual? I will read a list of possible places. For each, please tell me if you meet any new sexual partners there? |         |       |       |

|            |                                                                                                                                                     |                                                                    |     |  |
|------------|-----------------------------------------------------------------------------------------------------------------------------------------------------|--------------------------------------------------------------------|-----|--|
|            | <b>Q401a</b> = Private Home                                                                                                                         | 01= No<br>02= Yes<br>88= Refusal<br>99= Don't know                 | _ _ |  |
|            | <b>Q401b</b> = Bar, maquis or nightclub                                                                                                             | 01= No<br>02= Yes<br>88= Refusal<br>99= Don't know                 | _ _ |  |
|            | <b>Q401c</b> = Private Parties                                                                                                                      | 01= No<br>02= Yes<br>88= Refusal<br>99= Don't know                 | _ _ |  |
|            | <b>Q401d</b> = Brothels                                                                                                                             | 01= No<br>02= Yes<br>88= Refusal<br>99= Don't know                 | _ _ |  |
|            | <b>Q401e</b> = Street, park, public garden, or reserve                                                                                              | 01= No<br>02= Yes<br>88= Refusal<br>99= Don't know                 |     |  |
|            | <b>Q401f</b> = Private Vehicles                                                                                                                     | 01= No<br>02= Yes<br>88= Refusal<br>99= Don't know                 | _ _ |  |
|            | <b>Q401g</b> = Hotel or guest house                                                                                                                 | 01= No<br>02= Yes<br>88= Refusal<br>99= Don't know                 | _ _ |  |
|            | <b>Q401h</b> = Press Announcements or Cards                                                                                                         | 01= No<br>02= Yes<br>88= Refusal<br>99= Don't know                 | _ _ |  |
|            | <b>Q401i</b> = On the Internet                                                                                                                      | 01= No<br>02= Yes<br>88= Refusal<br>99= Don't know                 | _ _ |  |
|            | <b>Q401j</b> = Other (specify)                                                                                                                      | 01= No<br>02= Yes<br>Specify:<br><br>88= Refusal<br>99= Don't know | _ _ |  |
| <b>402</b> | Where do you have <u>sex</u> with your clients? I will read a list of possible places. For each, please tell me if you have sex with clients there? |                                                                    |     |  |
|            | <b>Q402a</b> = Private Homes                                                                                                                        | 01= No<br>02= Yes<br><br>88= Refusal<br>99= Don't know             | _ _ |  |
|            | <b>Q402b</b> = Bar, maquis or nightclub                                                                                                             | 01= No<br>02= Yes<br><br>88= Refusal<br>99= Don't know             | _ _ |  |

|            |                                                                                                                                                                           |                                                                                                                                        |  |                                 |
|------------|---------------------------------------------------------------------------------------------------------------------------------------------------------------------------|----------------------------------------------------------------------------------------------------------------------------------------|--|---------------------------------|
|            | <b>Q402c = Private Parties</b>                                                                                                                                            | 01= No<br>02= Yes<br><br>88= Refusal<br>99= Don't know                                                                                 |  |                                 |
|            | <b>Q402d = Brothels</b>                                                                                                                                                   | 01= No<br>02= Yes<br><br>88= Refusal<br>99= Don't know                                                                                 |  |                                 |
|            | <b>Q402e = Street, park, public garden, or reserves</b>                                                                                                                   | 01= No<br>02= Yes<br><br>88= Refusal<br>99= Don't know                                                                                 |  |                                 |
|            | <b>Q402f = Private Vehicle</b>                                                                                                                                            | 01= No<br>02= Yes<br><br>88= Refusal<br>99= Don't know                                                                                 |  |                                 |
|            | <b>Q402g = Hotel or guest house</b>                                                                                                                                       | 01= No<br>02= Yes<br><br>88= Refusal<br>99= Don't know                                                                                 |  |                                 |
|            | <b>Q402h = Other (specify)</b>                                                                                                                                            | 01= No<br>02= Yes<br>Specify:-<br><hr/> 88= Refusal<br>99= Don't know                                                                  |  |                                 |
| <b>403</b> | In the <u>past 6 months</u> , have you used a cell phone to set up meetings with clients?                                                                                 | 01= No<br>02= Yes<br><br>88= Refusal<br>99= Don't know                                                                                 |  | SI 01, 88 or 99, switch to Q405 |
| <b>404</b> | How often do you use a mobile phone to set up meetings with clients?                                                                                                      | 01= Never<br>02= Almost never<br>03= Sometimes<br>04= Often<br>05= Always<br><br>88= Refusal<br>99= Don't know                         |  |                                 |
| <b>405</b> | In the <u>past 6 months</u> , has a client used violence or force to coerce you into having <u>certain types</u> of sex when you didn't want to or agree?                 | 01 = No<br>02 = Yes, within the last 6 months<br>03 = It happened, but not in the last 6 months<br><br>88 = Refusal<br>99 = Don't know |  |                                 |
| <b>406</b> | In the <u>past 6 months</u> , have there been times when the number of partners who have come for sex with you has been more than the number you previously communicated? | 01 = No<br>02 = Yes, within the last 6 months<br>03 = It happened, but not in the last 6 months<br><br>88 = Refusal<br>99 = Don't know |  |                                 |

|     |                                                                                                         |                                                                                                                                        |     |  |
|-----|---------------------------------------------------------------------------------------------------------|----------------------------------------------------------------------------------------------------------------------------------------|-----|--|
| 407 | In the <u>past 6 months</u> , have you been offered or offered more money to have sex without a condom? | 01 = No<br>02 = Yes, within the last 6 months<br>03 = It happened, but not in the last 6 months<br><br>88 = Refusal<br>99 = Don't know | _ _ |  |
| 408 | In the <u>past 6 months</u> , has a client agreed to use a condom and then removed or refused it later? | 01 = No<br>02 = Yes, within the last 6 months<br>03 = It happened, but not in the last 6 months<br><br>88 = Refusal<br>99 = Don't know | _ _ |  |

## SECTION 5A: OCCASIONAL PARTNERS (CLIENTS)

"I'd like to start by asking you about occasional customers. By casual clients I mean partners with whom you have only had sex once or twice in your life, and for whom you have been paid. »"

| Num  | Questions                                                                                                                                                                                                                                                                                             | Answers                                                                                                                                                        | Codes | Jumps                            |
|------|-------------------------------------------------------------------------------------------------------------------------------------------------------------------------------------------------------------------------------------------------------------------------------------------------------|----------------------------------------------------------------------------------------------------------------------------------------------------------------|-------|----------------------------------|
| 501A | In the <u>past month</u> , with about how many casual partners have you had sex of any type (vaginal, anal or oral)?<br><br>For this and the following questions, if you have not had casual sex in the past month, please think about the most recent month in which you have had casual partner sex | <i>[Note the number of partners, if the answer is ZERO note 00]</i><br><br>88 = Refusal<br>99 = Don't know                                                     | ____  | If 00, go to the next section    |
| 502A | In the <u>past month</u> , have you discussed sexually transmitted infections or HIV with your casual partners?                                                                                                                                                                                       | 01= No<br>02= With some, but not all, casual partners<br>03= Yes, with all the casual partners (or the only one I've had)<br><br>88= Refusal<br>99= Don't know | ____  |                                  |
| 503A | In the <u>past month</u> , have you discussed their HIV status with your casual partners ?<br><br>(i.e. you ask them or they tell you, whether it is a positive or negative result)                                                                                                                   | 01= No<br>02= With some, but not all, casual partners<br>03= Yes, with all the casual partners (or the only one I've had)<br><br>88= Refusal<br>99= Don't know | ____  |                                  |
| 504A | In the <u>past month</u> , have you discussed your HIV status with your casual partners?<br><br>(That is, they ask you or you tell them, whether it's a positive or negative result)                                                                                                                  | 01= No<br>02= With some, but not all, casual partners<br>03= Yes, with all casual partners (or the alone)<br><br>88= Refusal<br>99= Don't know                 | ____  |                                  |
| 505A | In the <u>past month</u> , with about how many casual partners have you had <u>vaginal sex</u> ?                                                                                                                                                                                                      | <i>[Note the number of casual partners]</i><br><br>88= Refusal<br>99= Don't know                                                                               | ____  | If 00, 88, or 99, change to 507A |
| 506A | In the <u>past month</u> , how often have you used condoms during <u>vaginal sex</u> with your casual partners?<br><br>_____                                                                                                                                                                          | 01= Never<br>02= Almost never<br>03= Sometimes<br>04= Often<br>05= Always<br><br>88= Refusal<br>99= Don't know                                                 | ____  |                                  |

|      |                                                                                                                                                                                                                                                                           |                                                                                                                |      |                                  |
|------|---------------------------------------------------------------------------------------------------------------------------------------------------------------------------------------------------------------------------------------------------------------------------|----------------------------------------------------------------------------------------------------------------|------|----------------------------------|
| 507A | In the <u>past month</u> , with approximately how many <u>casual partners</u> have you had <u>anal sex</u> ?                                                                                                                                                              | [ <i>Note the number of new partners</i> ]<br>88= Refusal<br>99= Don't know                                    | □□□□ | If 00, 88, or 99, change to 509A |
| 508A | In the <u>past month</u> , how often have you used condoms during <u>anal sex</u> with your casual partners?                                                                                                                                                              | 01= Never<br>02= Almost never<br>03= Sometimes<br>04= Often<br>05= Always<br><br>88= Refusal<br>99= Don't know | □□□□ |                                  |
| 509A | In the <u>past month</u> , with about how many casual partners have you had <u>oral sex</u> ?                                                                                                                                                                             | [ <i>Note the number of partners</i> ]<br>88 = Refusal<br>99 = Don't know                                      | □□□□ | If 00, 88, or 99, switch to 511A |
| 510A | In the <u>past month</u> , how often have you used condoms during <u>oral sex</u> with your casual partners?                                                                                                                                                              | 01= Never<br>02= Almost never<br>03= Sometimes<br>04= Often<br>05= Always<br><br>88= Refusal<br>99= Don't know | □□□□ |                                  |
| 511A | Now, think about the last time you had vaginal or anal sex with a <u>casual</u> partner. You used a condom?                                                                                                                                                               | 01= No<br>02= Yes<br><br>88= Refusal<br>99= Don't know                                                         | □□□□ |                                  |
| 512A | Now, think about the <u>last time</u> you didn't use a condom with a casual partner during vaginal, anal, or oral sex. Why didn't you use a condom?<br><br>I will read a list of possible reasons. For each one, please tell me if this reason applies to your situation. |                                                                                                                |      |                                  |
|      | 512Aa = We forgot or we didn't think about it                                                                                                                                                                                                                             | 01= No<br>02= Yes<br>88= Refusal<br>99= Don't know                                                             | □□□□ |                                  |
|      | 512Ab = There was no condom available.                                                                                                                                                                                                                                    | 01= No<br>02= Yes<br>88= Refusal<br>99= Don't know                                                             | □□□□ |                                  |
|      | 512A c = There was no time to find a condom.                                                                                                                                                                                                                              | 01= No<br>02= Yes<br>88= Refusal<br>99= Don't know                                                             | □□□□ |                                  |
|      | 512A d = I don't like using condoms.                                                                                                                                                                                                                                      | 01= No<br>02= Yes<br>88= Refusal<br>99= Don't know                                                             | □□□□ |                                  |
|      | 512A e = Condoms are too expensive.                                                                                                                                                                                                                                       | 01= No<br>02= Yes<br>88= Refusal<br>99= Don't know                                                             | □□□□ |                                  |

|  |                                                                                                          |                                                    |                                                                            |  |
|--|----------------------------------------------------------------------------------------------------------|----------------------------------------------------|----------------------------------------------------------------------------|--|
|  | 512A f = I am uncomfortable when it comes to buying condoms.                                             | 01= No<br>02= Yes<br>88= Refusal<br>99= Don't know | <input type="checkbox"/> <input type="checkbox"/> <input type="checkbox"/> |  |
|  | 512Ag = I used another method of birth control                                                           | 01= No<br>02= Yes<br>88= Refusal<br>99= Don't know | <input type="checkbox"/> <input type="checkbox"/> <input type="checkbox"/> |  |
|  | 512Ah = Condoms are not necessary.                                                                       | 01= No<br>02= Yes<br>88= Refusal<br>99= Don't know | <input type="checkbox"/> <input type="checkbox"/> <input type="checkbox"/> |  |
|  | 512Ai = I don't trust condoms.                                                                           | 01= No<br>02= Yes<br>88= Refusal<br>99= Don't know | <input type="checkbox"/> <input type="checkbox"/> <input type="checkbox"/> |  |
|  | 512Aj = I used another method to prevent HIV or a sexually transmitted infection                         | 01= No<br>02= Yes<br>88= Refusal<br>99= Don't know | <input type="checkbox"/> <input type="checkbox"/> <input type="checkbox"/> |  |
|  | 512Ak = If I had used a condom or suggested using one, the partner would have thought I had an infection | 01= No<br>02= Yes<br>88= Refusal<br>99= Don't know | <input type="checkbox"/> <input type="checkbox"/> <input type="checkbox"/> |  |
|  | 512Al = The partner didn't like them or refused them                                                     | 01= No<br>02= Yes<br>88= Refusal<br>99= Don't know | <input type="checkbox"/> <input type="checkbox"/> <input type="checkbox"/> |  |
|  | 512Am = The partner is/was a safe partner                                                                | 01= No<br>02= Yes<br>88= Refusal<br>99= Don't know | <input type="checkbox"/> <input type="checkbox"/> <input type="checkbox"/> |  |
|  | 512Year = The partner offered more money for not using a condom.                                         | 01= No<br>02= Yes<br>88= Refusal<br>99= Don't know | <input type="checkbox"/> <input type="checkbox"/> <input type="checkbox"/> |  |
|  | 512Ao = The partner removed the condom.                                                                  | 01= No<br>02= Yes<br>88= Refusal<br>99= Don't know | <input type="checkbox"/> <input type="checkbox"/> <input type="checkbox"/> |  |
|  | 512Ap = Sexual intercourse was forced                                                                    | 01= No<br>02= Yes<br>88= Refusal<br>99= Don't know | <input type="checkbox"/> <input type="checkbox"/> <input type="checkbox"/> |  |
|  | 512QA = Other (specify)                                                                                  | 01= No<br>02= Yes<br>88= Refusal<br>99= Don't know | <input type="checkbox"/> <input type="checkbox"/> <input type="checkbox"/> |  |

**SECTION 5B: REGULAR PAYING PARTNERS (CUSTOMERS)**

"Then I'll ask about your regular customers. Regular customers are those with whom you have had sex at least three times in your life and who pay you for those relationships. >

|       |                                                                                                                                                                                                                                                                                                                                      |                                                                                                                                                                                 |                   |                                                   |
|-------|--------------------------------------------------------------------------------------------------------------------------------------------------------------------------------------------------------------------------------------------------------------------------------------------------------------------------------------|---------------------------------------------------------------------------------------------------------------------------------------------------------------------------------|-------------------|---------------------------------------------------|
| 501B  | <p>In the <u>past month</u>, with about how many regular paying partners have you had vaginal, anal or oral sex?</p> <p>For this and the following questions, if you haven't had sex with regular paying partners in the last month, please think about the most recent month in which you had sex with regular paying partners.</p> | <p><i>[Note the number of regular partners]</i></p> <p>88 = Refusal<br/>99 = Don't know</p>                                                                                     | <p>____ ____ </p> | <p>If 00, 88, or 99, skip to the next section</p> |
| 502 B | <p>In the <u>past month</u>, have you discussed sexually transmitted infections or HIV with your regular partners?</p>                                                                                                                                                                                                               | <p>01 = No<br/>02 = With some, but not all, regular partners<br/>03 = Yes, with all the regular partners (or the only one I've had)</p> <p>88 = Refusal<br/>99 = Don't know</p> | <p>____ ____ </p> |                                                   |
| 503 B | <p>In the <u>past month</u>, have you discussed their HIV status with regular partners? (i.e. you ask them or they tell you, whether it is a positive or negative result)</p>                                                                                                                                                        | <p>01 = No<br/>02 = With some, but not all, regular partners<br/>03 = Yes, with all (or only) regular partners</p> <p>88 = Refusal<br/>99 = Don't know</p>                      | <p>____ ____ </p> |                                                   |
| 504B  | <p>In the <u>past month</u>, have you discussed your HIV status with any regular partners?</p> <p>(That is, they ask you or you tell them, whether it's a positive or negative result)</p>                                                                                                                                           | <p>01 = No<br/>02 = With some, but not all, regular partners<br/>03 = Yes, with all regular partners (or the only one)</p> <p>88 = Refusal<br/>99 = Don't know</p>              | <p>____ ____ </p> |                                                   |
| 505B  | <p>In the <u>past month</u>, with about how many <u>regular partners</u> have you had <u>vaginal sex</u>?</p>                                                                                                                                                                                                                        | <p><i>[Note the number of regular partners]</i></p> <p>88 = Refusal<br/>99 = Don't know</p>                                                                                     | <p>____ ____ </p> | <p>SI 00, 88 or 99, change to 507B</p>            |
| 506B  | <p>In the <u>past month</u>, how often have you used condoms during <u>vaginal sex</u> with a <u>regular partner</u> ?</p>                                                                                                                                                                                                           | <p>01= Never<br/>02= Almost never<br/>03= Sometimes<br/>04= Often<br/>05= Always</p> <p>88= Refusal<br/>99= Don't know</p>                                                      | <p>____ ____ </p> |                                                   |
| 507B  | <p>In the <u>past month</u>, with about how many <u>regular partners</u> have you had <u>anal sex</u>?</p>                                                                                                                                                                                                                           | <p><i>[Note the number of regular partners]</i></p> <p>88 = Refusal<br/>99 = Don't know</p>                                                                                     | <p>____ ____ </p> | <p>SI 00, 88 or 99, change to 509B</p>            |



|      |                                                                                                                         |                                                                                                                |                          |                                  |
|------|-------------------------------------------------------------------------------------------------------------------------|----------------------------------------------------------------------------------------------------------------|--------------------------|----------------------------------|
| 508B | In the <u>past month</u> , how often have you used condoms during <u>anal sex</u> with a <u>regular partner</u> ?       | 01= Never<br>02= Almost never<br>03= Sometimes<br>04= Often<br>05= Always<br><br>88= Refusal<br>99= Don't know | _ _ _ <br><br><br> _ _ _ |                                  |
| 509B | In the <u>past month</u> , with about how many <u>regular partners</u> have you had <u>oral sex</u> ?                   | [Note the number of regular partners]<br><br>88 = Refusal<br>99 = Don't know                                   | _ _ _                    | SI 00, 88, or 99, change to 511B |
| 510B | In the <u>past month</u> , how often have you used condoms during <u>oral sex</u> with a partner? regular?<br><br>_____ | 01= Never<br>02= Almost never<br>03= Sometimes<br>04= Often<br>05= Always<br><br> _ _ _                        | _ _ _                    |                                  |
| 511B | Now, think about the last time you had vaginal sex or anal with a <u>regular partner</u> . You used a condom?           | 01 = No<br>02 = Yes<br><br>88 = Refusal<br>99 = Don't know                                                     | _ _ _                    |                                  |

| 512B | <p>Now, think about the <u>last time you didn't use a condom</u> with a regular paying partner during <u>vaginal or anal sex</u>. Why didn't you use a condom at that time?</p> <p>I will read a list of possible reasons. For each one, please tell me if this reason applies to your situation.</p> |                                                                                    |                                  |       |
|------|-------------------------------------------------------------------------------------------------------------------------------------------------------------------------------------------------------------------------------------------------------------------------------------------------------|------------------------------------------------------------------------------------|----------------------------------|-------|
| No.  | Question                                                                                                                                                                                                                                                                                              | Codes                                                                              | Answers                          | Jumps |
|      | 512Ba = We forgot or didn't think about it                                                                                                                                                                                                                                                            | 01= No<br>02= Yes<br><br>88= Refusal<br>99= Don't know                             | <input type="checkbox"/>         |       |
|      | 512Bb = There was no condom available.                                                                                                                                                                                                                                                                | 01= No<br>02= Yes<br><br>88= Refusal<br>99= Don't know                             | <input type="checkbox"/>         |       |
|      | 512Bc = There was no time to find a condom.                                                                                                                                                                                                                                                           | 01= No<br>02= Yes<br><br>88= Refusal<br>99= Don't know                             | <input type="checkbox"/>         |       |
|      | 512Bd = I don't like using condoms.                                                                                                                                                                                                                                                                   | 01= No<br>02= Yes<br><br>88= Refusal<br>99= Don't know                             | <input type="checkbox"/>         |       |
|      | 512Be = Condoms are too expensive.                                                                                                                                                                                                                                                                    | 01= No<br>02= Yes<br><br>88= Refusal<br>99= Don't know                             | <input type="checkbox"/>         |       |
|      | 512Bf = I am uncomfortable when it comes to buying condoms.                                                                                                                                                                                                                                           | 01= No<br>02= Yes<br><br>88= Refusal<br>99= Don't know                             | <input type="checkbox"/>         |       |
|      | 512Bg = I used another method of birth control                                                                                                                                                                                                                                                        | 01= No<br>02= Yes<br><br>88= Refusal<br>99= Don't know                             | <input type="checkbox"/>         |       |
|      | 512Bh = Condoms are not required.                                                                                                                                                                                                                                                                     | 01= No<br>02= Yes<br><br>88= Refusal<br>99= Don't know                             | --<br>  <input type="checkbox"/> |       |
|      | 512Bi = I don't trust condoms.                                                                                                                                                                                                                                                                        | 01= No<br>02= Yes<br><br>88= Refusal<br>99= Don't know                             | <input type="checkbox"/>         |       |
|      | 512Bj = I used another method to prevent HIV or a sexually transmitted infection                                                                                                                                                                                                                      | 01= No<br>02= Yes [Specify]<br>Specify: _____<br><br>88= Refusal<br>99= Don't know |                                  |       |

|  |                                                                                                          |                                                        |                          |  |
|--|----------------------------------------------------------------------------------------------------------|--------------------------------------------------------|--------------------------|--|
|  | 512Bk = If I had used a condom or suggested using one, the partner would have thought I had an infection | 01= No<br>02= Yes<br><br>88= Refusal<br>99= Don't know | <input type="checkbox"/> |  |
|  | 512Bl = The partner didn't like them or refused them                                                     | 01= No<br>02= Yes<br><br>88= Refusal<br>99= Don't know | <input type="checkbox"/> |  |
|  | 512Bm = The partner is/was a safe partner                                                                | 01= No<br>02=Yes<br><br>88= Refusal<br>99= Don't know  | <input type="checkbox"/> |  |
|  | 512Bn= The partner offered more money for not using a condom.                                            | 01= No<br>02=Yes<br><br>88= Refusal<br>99= Don't know  | <input type="checkbox"/> |  |
|  | 512Bo= The partner has removed the condom.                                                               | 01= No<br>02=Yes<br><br>88= Refusal<br>99= Don't know  | <input type="checkbox"/> |  |
|  | 512Bp= Sexual intercourse was forced                                                                     | 01= No<br>02=Yes<br><br>88= Refusal<br>99= Don't know  | <input type="checkbox"/> |  |
|  | 512Bq= Other (specify)                                                                                   | 01= No<br>02=Yes<br><br>88= Refusal<br>99= Don't know  | <input type="checkbox"/> |  |

**SECTION 5C. NON-PAYING SEX PARTNERS**

"Now I'm going to ask about your non-paying partners. That is, the partners with whom you have sex, but who are not your clients and therefore do not pay you in exchange for these relationships. This can include partners you live with, a boyfriend or girlfriends (who don't pay you), and a husband. This also includes partners with whom you have sex to please yourself, without any payment. »

| No.  | Questions                                                                                                                                                                                                                                                                                                                        | Codes                                                                                                                                                                              | Answers | Jump                              |
|------|----------------------------------------------------------------------------------------------------------------------------------------------------------------------------------------------------------------------------------------------------------------------------------------------------------------------------------|------------------------------------------------------------------------------------------------------------------------------------------------------------------------------------|---------|-----------------------------------|
| 501C | <p>In the <u>past month</u>, with approximately how many non-paying partners have you had vaginal, anal or oral sex?</p> <p>For this and the following questions, if you haven't had sex with non-paying partners in the last month, please think about the most recent month in which you had sex with non-paying partners.</p> | <p><i>[Note the number of non-paying partners]</i></p> <p>88 = Refusal<br/>99 = Don't know</p>                                                                                     | _ _ _   | If 00, go to the next section     |
| 502C | <p>In the <u>past month</u>, have you discussed sexually transmitted infections or HIV with your non-paying partners?</p>                                                                                                                                                                                                        | <p>01 = No<br/>02 = With some, but not all, regular partners<br/>03 = Yes, with all the non-paying partners (or the only one I've had)</p> <p>88 = Refusal<br/>99 = Don't know</p> | _ _ _   |                                   |
| 503C | <p>In the <u>past month</u>, have you discussed their HIV status with non-paying partners? (i.e. you ask them or they tell you, whether it is a positive or negative result)</p>                                                                                                                                                 | <p>01 = No<br/>02 = With some, but not all, non-paying partners<br/>03 = Yes, with all non-paying partners (or the only one)</p> <p>88 = Refusal<br/>99 = Don't know</p>           | _ _ _   |                                   |
| 504C | <p>In the <u>past month</u>, have you discussed your HIV status with non-paying partners?</p> <p>(That is, they ask you or you tell them, whether it's a positive or negative result)</p>                                                                                                                                        | <p>01 = No<br/>02 = With some, but not all, non-paying partners<br/>03 = Yes, with all non-paying partners (or the only one)</p> <p>88 = Refusal<br/>99 = Don't know</p>           | _ _ _   |                                   |
| 505C | <p>In the <u>past month</u>, with about how many <u>non-paying partners</u> have you had <u>vaginal sex</u>?</p>                                                                                                                                                                                                                 | <p><i>[Note the number of non-paying partners]</i></p> <p>88 = Refusal<br/>99 = Don't know</p>                                                                                     | _ _ _   | If 00, 88, or 99, switch to Q507C |
| 506C | <p>In the <u>past month</u>, how often have you used condoms during <u>vaginal sex</u> with a <u>non-paying partner</u>?</p>                                                                                                                                                                                                     | <p>01= Never<br/>02= Almost never<br/>03= Sometimes<br/>04= Often<br/>05= Always</p>                                                                                               | _ _ _   |                                   |

|      |                                                                                                                                                                                                                                                                                               |                                                                                                                |       |                                   |
|------|-----------------------------------------------------------------------------------------------------------------------------------------------------------------------------------------------------------------------------------------------------------------------------------------------|----------------------------------------------------------------------------------------------------------------|-------|-----------------------------------|
|      |                                                                                                                                                                                                                                                                                               | 88= Refusal<br>99= Don't know                                                                                  |       |                                   |
| 507C | In the <u>past month</u> , with about how many <u>non-paying</u> partners have you had <u>anal sex</u> ?                                                                                                                                                                                      | [Note the number of <u>non-paying</u> partners]<br><br>88 = Refusal<br>99 = Don't know                         | _ _ _ | If 00, 88, or 99, switch to Q509C |
| 508C | <b>4.28</b> In the <u>past month</u> , how often have you used condoms during <u>anal</u> sex with a <u>non-paying</u> partner?                                                                                                                                                               | 01= Never<br>02= Almost never<br>03= Sometimes<br>04= Often<br>05= Always<br><br>88= Refusal<br>99= Don't know | _ _ _ |                                   |
| 509C | In the <u>past month</u> , with about how many <u>non-paying</u> partners have you had <u>oral sex</u> ?                                                                                                                                                                                      | [Note the number of <u>non-paying</u> partners]<br><br>88 = Refusal<br>99 = Don't know                         | _ _ _ | If 00, 88, or 99, switch to Q511C |
| 510C | In the <u>past month</u> , how often have you used condoms during <u>oral</u> sex with a partner? <u>Not</u> paying?<br><br>_____                                                                                                                                                             | 01= Never<br>02= Almost never<br>03= Sometimes<br>04= Often<br>05= Always                                      | _ _ _ |                                   |
| 511C | Now, think about the last time you had vaginal sex or anal with a <u>non-paying</u> partner . You used a condom?                                                                                                                                                                              | 01 = No<br>02 = Yes<br>88 = Refusal<br>99 = Don't know                                                         | _ _ _ |                                   |
| 512C | Now, think about the <u>last time</u> you didn't use a condom with a non-paying partner during <u>vaginal</u> or <u>anal</u> sex. Why didn't you use a condom at that time?<br>I will read a list of possible reasons. For each one, please tell me if this reason applies to your situation. |                                                                                                                |       |                                   |
|      | 512Ca = We forgot or we didn't think about it                                                                                                                                                                                                                                                 | 01= No<br>02= Yes<br><br>88= Refusal<br>99= Don't know                                                         | _ _ _ |                                   |

|                                                                                                          |                                                                                    |                          |  |
|----------------------------------------------------------------------------------------------------------|------------------------------------------------------------------------------------|--------------------------|--|
| 512Cb = There was no condom available.                                                                   | 01= No<br>02= Yes<br><br>88= Refusal<br>99= Don't know                             | <input type="checkbox"/> |  |
| 512Cc = There was no time to find a condom.                                                              | 01= No<br>02= Yes<br><br>88= Refusal<br>99= Don't know                             | <input type="checkbox"/> |  |
| 512Cd = I don't like using condoms.                                                                      | 01= No<br>02= Yes<br><br>88= Refusal<br>99= Don't know                             | <input type="checkbox"/> |  |
| 512Ce = Condoms are too expensive.                                                                       | 01= No<br>02= Yes<br><br>88= Refusal<br>99= Don't know                             | <input type="checkbox"/> |  |
| 512Cf = I'm uncomfortable when it comes to buying condoms.                                               | 01= No<br>02= Yes<br><br>88= Refusal<br>99= Don't know                             | <input type="checkbox"/> |  |
| 512Cg = I used another method of birth control                                                           | 01= No<br>02= Yes<br><br>88= Refusal<br>99= Don't know                             | <input type="checkbox"/> |  |
| 512Ch = Condoms are not necessary.                                                                       | 01= No<br>02= Yes<br><br>88= Refusal<br>99= Don't know                             | <input type="checkbox"/> |  |
| 512Ci = I don't trust condoms.                                                                           | 01= No<br>02= Yes<br><br>88= Refusal<br>99= Don't know                             | <input type="checkbox"/> |  |
| 512Cj = I used another method to prevent HIV or a sexually transmitted infection                         | 01= No<br>02= Yes [Specify]<br>Specify: _____<br><br>88= Refusal<br>99= Don't know | ___<br>___               |  |
| 512Ck = If I had used a condom or suggested using one, the partner would have thought I had an infection | 01= No<br>02= Yes<br><br>88= Refusal<br>99= Don't know                             | <input type="checkbox"/> |  |
| 512Cl = The partner didn't like them or refused them                                                     | 01= No<br>02= Yes<br><br>88= Refusal<br>99= Don't know                             | <input type="checkbox"/> |  |

|  |                                                               |                                                       |                          |  |
|--|---------------------------------------------------------------|-------------------------------------------------------|--------------------------|--|
|  | 512Cm = The partner is/was a safe partner                     | 01= No<br>02=Yes<br><br>88= Refusal<br>99= Don't know | <input type="checkbox"/> |  |
|  | 512Cn= The partner offered more money for not using a condom. | 01= No<br>02=Yes<br><br>88= Refusal<br>99= Don't know | <input type="checkbox"/> |  |
|  | 512Co= The partner has removed the condom.                    | 01= No<br>02=Yes<br><br>88= Refusal<br>99= Don't know | <input type="checkbox"/> |  |
|  | 512Cp= Sexual intercourse was forced                          | 01= No<br>02=Yes<br><br>88= Refusal<br>99= Don't know | <input type="checkbox"/> |  |
|  | 512Cq= Other (specify)                                        | 01= No<br>02=Yes<br><br>88= Refusal<br>99= Don't know | <input type="checkbox"/> |  |

**SECTION 6A: MALE CONDOM**

| No.  | Questions                                                                                                                                                                                                       | Codes                                                                                                                                                                                    | Response Codes                                                                                                                                                                                                                                                                                                   | Jump                               |
|------|-----------------------------------------------------------------------------------------------------------------------------------------------------------------------------------------------------------------|------------------------------------------------------------------------------------------------------------------------------------------------------------------------------------------|------------------------------------------------------------------------------------------------------------------------------------------------------------------------------------------------------------------------------------------------------------------------------------------------------------------|------------------------------------|
| 601A | Has the respondent had to use condoms with paid or non-paying partners and/or both (2) at the same time?<br><br><i>Check with 5A, 5B and 5C</i>                                                                 | 01 = No<br>02 = Yes                                                                                                                                                                      | <input type="checkbox"/>                                                                                                                                                                                                                                                                                         | If 01 switch to Q604A              |
| 602A | Have you ever heard of the male condom?<br><br><b>Show a photo or condom.</b><br><br>(This is a rubber object that the man puts on his penis before having sex.)                                                | 01=No<br>02=Yes<br><br>88= Refusal<br>99= Don't know                                                                                                                                     | <input type="checkbox"/>                                                                                                                                                                                                                                                                                         | If 01, proceed to the next section |
| 603A | Have you ever used a male condom with a sexual partner?<br><br>Show a photo or condom.<br><br>(The respondent may not have used a condom with partners in sections 3-4, but may have used it once in the past). | 01=No<br>02=Yes<br><br>88= Refusal<br>99= Don't know                                                                                                                                     | <input type="checkbox"/>                                                                                                                                                                                                                                                                                         |                                    |
| 604A | Do you know of a place where you can get male condoms, or someone you can get them from?                                                                                                                        | 01=No<br>02=Yes<br><br>88= Refusal<br>99= Don't know                                                                                                                                     | <input type="checkbox"/>                                                                                                                                                                                                                                                                                         |                                    |
| 605A | Where can you get male condoms, or who can you get them from?<br><br><b>Probe without suggesting</b><br><br>Are there other places and people that you have not mentioned?                                      | a) Shop<br>b) Kiosk<br>c) Pharmacy<br>d) Market<br>e) Health training<br>f) Bar/hotel<br>g) Health Facilitator<br>h) Peer Educator<br>i) Friend<br>j) Other _____<br><br>k) Non-response | <input type="checkbox"/><br><input type="checkbox"/> |                                    |
| 606A | How long does it take you to get a condom from the place closest to your home or workplace?                                                                                                                     | a) Less than 5 minutes<br>b) 5 to 15 minutes<br>c) 15 minutes to an hour<br>d) More than an hour<br>e) Don't know<br>f) No response                                                      | <input type="checkbox"/><br><input type="checkbox"/><br><input type="checkbox"/><br><input type="checkbox"/><br><input type="checkbox"/><br><input type="checkbox"/>                                                                                                                                             |                                    |
| 607A | In the past 6 months, have you had sex <i>without using</i> a condom with a paying sexual partner or another type of partner with whom you have never cohabited and to whom you have not been married?          | 01 = No<br>02 = Yes<br>03 = Don't remember<br>99 = Non-response                                                                                                                          | <input type="checkbox"/>                                                                                                                                                                                                                                                                                         |                                    |



| No.  | Questions                                                                            | Codes                                                                                                                                                                                  | Response Codes                                                                                                                                                                 | Jump                         |
|------|--------------------------------------------------------------------------------------|----------------------------------------------------------------------------------------------------------------------------------------------------------------------------------------|--------------------------------------------------------------------------------------------------------------------------------------------------------------------------------|------------------------------|
| 608A | In the past 6 months, have you ever used more than one condom at a time?             | 01=No<br>02=Yes<br><br>88= Refusal<br>99= Don't know                                                                                                                                   | <input type="checkbox"/>                                                                                                                                                       | If 2<br>switch to<br>Q610    |
| 609A | When do you use more than one condom at a time?<br><br>(several answers possible)    | 01=Doubt of the good health of the partner<br><br>02=Paid Partner<br>03=Don't know the partner<br>04=Pregnancy<br>05=Other<br>(specify) _____<br><br>88 = Refusal<br>99 = Non-response | <input type="checkbox"/><br>  <input type="checkbox"/><br>  <input type="checkbox"/><br>  <input type="checkbox"/><br>  <input type="checkbox"/><br>  <input type="checkbox"/> |                              |
| 610A | In the past 6 months, have you ever had the condom you are using tear during use?    | 01=No<br>02=Yes<br><br>88= Refusal<br>99= Don't know                                                                                                                                   | <input type="checkbox"/>                                                                                                                                                       | If 01,<br>switch to<br>Q612A |
| 611A | Why do you think the condom has broken during use?<br><br>(several answers possible) | 01=Poor quality<br>02=Poor condom storage<br>03=Incorrect way to use it<br>04=Expired condom<br>05=Other<br><br>_____<br>99=No response                                                | <input type="checkbox"/><br>  <input type="checkbox"/><br>  <input type="checkbox"/><br>  <input type="checkbox"/><br>  <input type="checkbox"/>                               |                              |
| 612A | What are the top three condom brands you prefer to use?                              | 01=None<br>02=Caution<br>03=Protector<br>04=Desireex<br>05=Kamsutra<br>06=Manix<br>07=Kiss<br>08=Preventor<br>09=Sultan<br>10=Unbranded<br>11=Other .....<br>99=No response            | <input type="checkbox"/><br>  <input type="checkbox"/><br>  <input type="checkbox"/>                                                                                           |                              |
| 613A | What are the main reasons why you prefer this brand?                                 | 01=Affordable price<br>02=High quality<br>03=Widely available<br>04=More comfortable<br>05=Other .....<br>06=Don't know<br>99=No response                                              | <input type="checkbox"/><br>  <input type="checkbox"/><br>  <input type="checkbox"/>                                                                                           |                              |

**SECTION 6B: FEMALE CONDOM**

| No.   | Questions and Filters                                                                                                                                                                                      | Response Codes                                                                                                                                                                                                                                                                    | Codes                                                                                                                                                                                                                                                                                                                                                                                                                       | Skip to                                                                                                      |
|-------|------------------------------------------------------------------------------------------------------------------------------------------------------------------------------------------------------------|-----------------------------------------------------------------------------------------------------------------------------------------------------------------------------------------------------------------------------------------------------------------------------------|-----------------------------------------------------------------------------------------------------------------------------------------------------------------------------------------------------------------------------------------------------------------------------------------------------------------------------------------------------------------------------------------------------------------------------|--------------------------------------------------------------------------------------------------------------|
| Q601B | <p>Have you ever heard of the female condom?<br/> <b>(Show a female condom)</b></p> <p>(This is a rubber object that the woman inserts into her vagina before having sex)</p>                              | <p>01=No<br/>           02=Yes</p> <p>88= Refusal<br/>           99= Don't know</p>                                                                                                                                                                                               | <p>  <input type="checkbox"/></p>                                                                                                                                                                                                                                                                                                                                                                                           | <p>If <b>01</b>,<br/>           proceed<br/>           to the<br/>           next<br/>           section</p> |
| Q602B | <p>Have you used a female condom during sex in the past 6 months?</p>                                                                                                                                      | <p>01=No<br/>           02=Yes</p> <p>88= Refusal<br/>           99= Don't know</p>                                                                                                                                                                                               | <p>  <input type="checkbox"/></p>                                                                                                                                                                                                                                                                                                                                                                                           |                                                                                                              |
| Q603B | <p>What do you think of the female condom?<br/> <b>(Show a female condom)</b></p> <p><b>(several answers possible)</b></p>                                                                                 | <p>01=Convenient<br/>           02=Helpful<br/>           03=Comfortable<br/>           04=Accessible<br/>           05=Affordable price<br/>           06=Available<br/>           07=Too thick<br/>           88<br/>           =Autres _____<br/>           99 =Don't know</p> | <p>  <input type="checkbox"/><br/>             <input type="checkbox"/></p> |                                                                                                              |
| Q604B | <p>Do you know of a place where you can get female condoms, or someone you can get them from?</p>                                                                                                          | <p>01=No<br/>           02=Yes</p> <p>88= Refusal<br/>           99= Don't know</p>                                                                                                                                                                                               | <p>  <input type="checkbox"/></p>                                                                                                                                                                                                                                                                                                                                                                                           |                                                                                                              |
| Q606B | <p>Where can you get female condoms, or who can you get them from?</p> <p><b>Probe without suggesting and circle all answers</b></p> <p>Are there other places and people that you have not mentioned?</p> | <p>a) Shop<br/>           b) Kiosk<br/>           c) Pharmacy<br/>           d) Market<br/>           e) CSPS<br/>           f) Bar/hotel<br/>           g) Health Facilitator<br/>           h) Peer Educator<br/>           i) Friend<br/>           j) Other _____</p>         | <p>O N<br/>           1 2<br/>           1 2</p>                                                                                                                                                                                                 |                                                                                                              |

**SECTION 6C. GELS AND LUBRICANTS**

| Number | Questions                                                                                                                       | Codes                                                                                                                                                                                                                                                          | Response codes                                              | Jumps             |
|--------|---------------------------------------------------------------------------------------------------------------------------------|----------------------------------------------------------------------------------------------------------------------------------------------------------------------------------------------------------------------------------------------------------------|-------------------------------------------------------------|-------------------|
| Q601C  | Do you use lubricated condoms for <u>sexual intercourse</u> ?                                                                   | 01= No<br>02= Yes                                                                                                                                                                                                                                              | □□□                                                         |                   |
| Q602C  | Do you use lubricants with condoms at once?                                                                                     | 01= No<br>02= Yes                                                                                                                                                                                                                                              | □□□                                                         | If NO, go to Q701 |
| Q603C  | Do you have access to lubricants when you need them? (By that I mean, are you able to buy them or get them for free somewhere?) | 01 = No access<br>02= difficult or limited access<br>03= Somewhat difficult access<br>04= Fairly easy to access<br>05= Very easy to access                                                                                                                     | □□□                                                         |                   |
| Q604C  | What kind of lubricant do you usually use during sex?                                                                           | 01= Petroleum gel or petroleum jelly<br>02= body creams or ointment<br>03 = Water-based lubricant (e.g. Durex, Vendome, Manex)<br>04 = Saliva<br>05= cooking oil<br>06= No use of lubricant<br>07 = Other (to be specified)<br>88 = Refusal<br>99 = Don't know | □□□<br>□□□<br>□□□<br>□□□<br>□□□<br>□□□<br>□□□<br>□□□<br>□□□ |                   |

**SECTION 7: STI HISTORY**

| No.  | Questions                                                                                                                                                                                                                                                                                                                                                                          | Codes                                                  | Response Codes | Jump |
|------|------------------------------------------------------------------------------------------------------------------------------------------------------------------------------------------------------------------------------------------------------------------------------------------------------------------------------------------------------------------------------------|--------------------------------------------------------|----------------|------|
| Q701 | In the <u>past 6 months</u> , have you been tested for a sexually transmitted infection (including syphilis, gonorrhea, chlamydia, herpes, or another infection)?                                                                                                                                                                                                                  | 01= No<br>02= Yes<br><br>88= Refusal<br>99= Don't know | □□□            |      |
| Q702 | In the <u>past 6 months</u> , have you been informed by a doctor or other healthcare professional that you have a sexually transmitted infection (such as syphilis, gonorrhea, chlamydia, or herpes)? I will read you a list of possible infections. For each one, please tell me if you have been informed by a doctor or other health professional that you have this infection. |                                                        |                |      |
|      | <b>702a = Syphilis</b>                                                                                                                                                                                                                                                                                                                                                             | 01= No<br>02= Yes<br>88= Refusal<br>99= Don't know     | □□□            |      |
|      | <b>702b = Gonorrhea/gonorrhea</b>                                                                                                                                                                                                                                                                                                                                                  | 01= No<br>02= Yes<br>88= Refusal<br>99= Don't know     | □□□            |      |
|      | <b>702c = Chlamydia</b>                                                                                                                                                                                                                                                                                                                                                            | 01= No<br>02= Yes<br>88= Refusal<br>99= Don't know     | □□□            |      |
|      | <b>702d = Herpes</b>                                                                                                                                                                                                                                                                                                                                                               | 01= No<br>02= Yes<br>88= Refusal<br>99= Don't know     | □□□            |      |
|      | <b>702e = Human papillomavirus (HPV)</b>                                                                                                                                                                                                                                                                                                                                           | 01 = No<br>02= Yes<br>88= Refusal                      | □□□            |      |

| No.         | Questions                                                                                                                                                                        | Codes                                                                                                                                                                                                                                                         | Response Codes                              | Jump                            |
|-------------|----------------------------------------------------------------------------------------------------------------------------------------------------------------------------------|---------------------------------------------------------------------------------------------------------------------------------------------------------------------------------------------------------------------------------------------------------------|---------------------------------------------|---------------------------------|
|             |                                                                                                                                                                                  | 99= Don't know                                                                                                                                                                                                                                                |                                             |                                 |
|             | <b>702f = Hepatitis B</b>                                                                                                                                                        | 01= No<br>02= Yes<br>88= Refusal<br>99= Don't know                                                                                                                                                                                                            |                                             |                                 |
|             | <b>702g = Hepatitis C</b>                                                                                                                                                        | 01= No<br>02= Yes<br>88= Refusal<br>99= Don't know                                                                                                                                                                                                            |                                             |                                 |
|             | <b>702h = Other (specify)</b>                                                                                                                                                    | 01= No<br>02= Yes<br>Specify: _____<br>88= Refusal<br>99= Don't know                                                                                                                                                                                          |                                             |                                 |
| <b>Q703</b> | Have you ever had a vaccination to prevent hepatitis B?                                                                                                                          | 01= No<br>02= Yes<br>88= Refusal<br>99= Don't know                                                                                                                                                                                                            |                                             |                                 |
| <b>Q704</b> | In the <u>past 6 months</u> , have you had any symptoms of a sexually transmitted infection, including abnormal fluid that has come out of your penis, or sores on the genitals? | 01= No<br>02= Yes<br><br>88= <i>Refusal</i><br>99= <i>Don't know</i> ]                                                                                                                                                                                        |                                             | If 01, 88 or 99, switch to Q801 |
|             | <b>Q704a.</b> Has this infection been treated by a doctor or other healthcare professional?                                                                                      | 01= No, no treatment<br>02= Yes, treated by a doctor or other healthcare professional<br>03= No, handled by myself<br>04= No, treated by a traditional healer<br>05= No, handled by someone else (specify)<br>Specify: _____<br>88= Refusal<br>99= Don't know | <br>   <br><br>   <br>   <br>   <br>   <br> |                                 |
|             | <b>704b.</b> When you had these symptoms, did you avoid seeking medical attention because you were afraid that someone might find out that you were a sex worker?                | 01= No<br>02= Yes<br><br>88= Refusal<br>99= Don't know                                                                                                                                                                                                        |                                             |                                 |

**SECTION 8: HIV KNOWLEDGE, OPINIONS AND ATTITUDES**

| No.  | Questions                                                                                                          | Codes                                                                                                                                                                       | Answers                                                                                                                                                                                                                                                                                                                                                                                                                                                                                                                                                                                                                                      | Jump                          |
|------|--------------------------------------------------------------------------------------------------------------------|-----------------------------------------------------------------------------------------------------------------------------------------------------------------------------|----------------------------------------------------------------------------------------------------------------------------------------------------------------------------------------------------------------------------------------------------------------------------------------------------------------------------------------------------------------------------------------------------------------------------------------------------------------------------------------------------------------------------------------------------------------------------------------------------------------------------------------------|-------------------------------|
| 801  | Have you ever heard of HIV or a disease called AIDS?                                                               | 01= No<br>02= Yes<br><br>88= Refusal<br>99= Don't know                                                                                                                      | <input type="checkbox"/> <input type="checkbox"/> <input type="checkbox"/>                                                                                                                                                                                                                                                                                                                                                                                                                                                                                                                                                                   | If 01, go to the next section |
| 802  | Through which channels?<br><i>Several answers are possible.</i>                                                    | 01=Radio<br>02=TV<br>03=Health facilities<br>05= AIDS Kiosks<br>06=NGO, association<br>07=CDV<br>08=Workshop/Seminars<br>09=Relatives, friends, acquaintances<br>Other----- | <input type="checkbox"/> <input type="checkbox"/> <input type="checkbox"/><br><input type="checkbox"/> <input type="checkbox"/> <input type="checkbox"/> |                               |
| 803  | How often?                                                                                                         | 01 = Rarely<br>02 = Sometimes<br>03 = Frequently                                                                                                                            | <input type="checkbox"/> <input type="checkbox"/> <input type="checkbox"/>                                                                                                                                                                                                                                                                                                                                                                                                                                                                                                                                                                   |                               |
| 804a | Do you know someone who is infected with the HIV virus or who has died of AIDS?                                    | 01= No<br>02= Yes<br><br>88= Refusal<br>99= Don't know                                                                                                                      | <input type="checkbox"/> <input type="checkbox"/> <input type="checkbox"/>                                                                                                                                                                                                                                                                                                                                                                                                                                                                                                                                                                   | If 01, 88, 99 switch to Q805  |
| 804b | Do you have a close relative or friend who is infected with HIV or has died of AIDS?                               | Yes, a close relative<br>Yes, a close friend<br>No<br>Non-response                                                                                                          | <input type="checkbox"/> <input type="checkbox"/> <input type="checkbox"/>                                                                                                                                                                                                                                                                                                                                                                                                                                                                                                                                                                   |                               |
| 805  | Do you think you can protect yourself from the AIDS virus by using a condom correctly every time you have sex?     | 01= No<br>02= Yes<br><br>88= Refusal<br>99= Don't know                                                                                                                      | <input type="checkbox"/> <input type="checkbox"/> <input type="checkbox"/>                                                                                                                                                                                                                                                                                                                                                                                                                                                                                                                                                                   |                               |
| 806  | Can you catch the AIDS virus through mosquito bites?                                                               | 01= No<br>02= Yes<br><br>88= Refusal<br>99= Don't know                                                                                                                      | <input type="checkbox"/> <input type="checkbox"/> <input type="checkbox"/>                                                                                                                                                                                                                                                                                                                                                                                                                                                                                                                                                                   |                               |
| 807  | Can you protect yourself from the AIDS virus by only having sex with an uninfected partner who is faithful to you? | 01= No<br>02= Yes<br><br>88= Refusal<br>99= Don't know                                                                                                                      | <input type="checkbox"/> <input type="checkbox"/> <input type="checkbox"/>                                                                                                                                                                                                                                                                                                                                                                                                                                                                                                                                                                   |                               |
| 808  | Can we protect ourselves against the AIDS virus by abstaining from sexual intercourse?                             | 01= No<br>02= Yes<br><br>88= Refusal<br>99= Don't know                                                                                                                      | <input type="checkbox"/> <input type="checkbox"/> <input type="checkbox"/>                                                                                                                                                                                                                                                                                                                                                                                                                                                                                                                                                                   |                               |
| 809  | Can you get the AIDS virus by sharing a meal with a person who is infected (with HIV)?                             | 01= No<br>02= Yes<br><br>88= Refusal<br>99= Don't know                                                                                                                      | <input type="checkbox"/> <input type="checkbox"/> <input type="checkbox"/>                                                                                                                                                                                                                                                                                                                                                                                                                                                                                                                                                                   |                               |

| No. | Questions                                                                                                                       | Codes                                                                                                  | Answers                                                                                                                                                                                                                                                                                                                                                                                            | Jump                                   |
|-----|---------------------------------------------------------------------------------------------------------------------------------|--------------------------------------------------------------------------------------------------------|----------------------------------------------------------------------------------------------------------------------------------------------------------------------------------------------------------------------------------------------------------------------------------------------------------------------------------------------------------------------------------------------------|----------------------------------------|
| 810 | Can you catch the AIDS virus by receiving injections with a needle used in another person?                                      | 01= No<br>02= Yes<br><br>88= Refusal<br>99= Don't know                                                 | <input type="checkbox"/> <input type="checkbox"/> <input type="checkbox"/>                                                                                                                                                                                                                                                                                                                         |                                        |
| 811 | Can you get AIDS from having the blood of a person infected with HIV transfused?                                                | 01= No<br>02= Yes<br><br>88= Refusal<br>99= Don't know                                                 | <input type="checkbox"/> <input type="checkbox"/> <input type="checkbox"/>                                                                                                                                                                                                                                                                                                                         |                                        |
| 812 | Do you think that an apparently healthy person can carry the virus that causes AIDS?                                            | 01= No<br>02= Yes<br><br>88= Refusal<br>99= Don't know                                                 | <input type="checkbox"/> <input type="checkbox"/> <input type="checkbox"/>                                                                                                                                                                                                                                                                                                                         |                                        |
| 813 | Can a pregnant woman infected with HIV or AIDS avoid transmitting the virus to her fetus?                                       | 01= No<br>02= Yes<br><br>88= Refusal<br>99= Don't know                                                 | <input type="checkbox"/> <input type="checkbox"/> <input type="checkbox"/>                                                                                                                                                                                                                                                                                                                         | <b>If 01, 88 or 99, switch to Q815</b> |
| 814 | <u>If so, how?</u><br><br><u>Not reading the list</u>                                                                           | 01=Taking medication<br>02=Pray a lot<br>03=Taking decoctions<br>04=Autre _____<br><br>99=Non-response | <input type="checkbox"/> <input type="checkbox"/> <input type="checkbox"/><br><input type="checkbox"/> <input type="checkbox"/> <input type="checkbox"/> |                                        |
| 815 | Can a woman infected with HIV or AIDS transmit the virus to her newborn through breastfeeding?                                  | 01= No<br>02= Yes<br><br>88= Refusal<br>99= Don't know                                                 | <input type="checkbox"/> <input type="checkbox"/> <input type="checkbox"/>                                                                                                                                                                                                                                                                                                                         |                                        |
| 816 | Will you share a meal with someone you know is infected with HIV or who has AIDS?                                               | 01= No<br>02= Yes<br><br>88= Refusal<br>99= Don't know                                                 | <input type="checkbox"/> <input type="checkbox"/> <input type="checkbox"/>                                                                                                                                                                                                                                                                                                                         |                                        |
| 817 | In your opinion, if one of your male relatives was infected with HIV or AIDS, would you be willing to treat him in your home?   | 01= No<br>02= Yes<br><br>88= Refusal<br>99= Don't know                                                 | <input type="checkbox"/> <input type="checkbox"/> <input type="checkbox"/>                                                                                                                                                                                                                                                                                                                         |                                        |
| 818 | In your opinion, if a young person is infected with HIV (but is not sick), would you be willing to live with him/her?           | 01= No<br>02= Yes<br><br>88= Refusal<br>99= Don't know                                                 | <input type="checkbox"/> <input type="checkbox"/> <input type="checkbox"/>                                                                                                                                                                                                                                                                                                                         |                                        |
| 819 | In your opinion, if a student is infected with HIV (but is not sick), should he be allowed to continue going to school?         | 01= No<br>02= Yes<br><br>88= Refusal<br>99= Don't know                                                 | <input type="checkbox"/> <input type="checkbox"/> <input type="checkbox"/>                                                                                                                                                                                                                                                                                                                         |                                        |
| 820 | In your opinion, if one of your female relatives was infected with HIV or AIDS, would you be willing to treat her in your home? | 01= No<br>02= Yes<br><br>88= Refusal<br>99= Don't know                                                 | <input type="checkbox"/> <input type="checkbox"/> <input type="checkbox"/>                                                                                                                                                                                                                                                                                                                         |                                        |
| 821 | In your opinion, if by chance your boyfriend/girlfriend is infected but not                                                     | 01= No<br>02= Yes                                                                                      | <input type="checkbox"/> <input type="checkbox"/> <input type="checkbox"/>                                                                                                                                                                                                                                                                                                                         |                                        |

| No. | Questions                                                                                                                                                                         | Codes                                                                                                                                                                  | Answers                                                                                                                                                                                                                                                                                                                                                                                                                                                                                                                                                                                                                                      | Jump                         |
|-----|-----------------------------------------------------------------------------------------------------------------------------------------------------------------------------------|------------------------------------------------------------------------------------------------------------------------------------------------------------------------|----------------------------------------------------------------------------------------------------------------------------------------------------------------------------------------------------------------------------------------------------------------------------------------------------------------------------------------------------------------------------------------------------------------------------------------------------------------------------------------------------------------------------------------------------------------------------------------------------------------------------------------------|------------------------------|
|     | sick, would you be ready to live with him/her?                                                                                                                                    | 88= Refusal<br>99= Don't know                                                                                                                                          |                                                                                                                                                                                                                                                                                                                                                                                                                                                                                                                                                                                                                                              |                              |
| 822 | In your opinion, if a teacher is infected with HIV (but is not sick), should he or she be able to continue teaching at school?                                                    | 01= No<br>02= Yes<br><br>88= Refusal<br>99= Don't know                                                                                                                 | <input type="checkbox"/> <input type="checkbox"/> <input type="checkbox"/>                                                                                                                                                                                                                                                                                                                                                                                                                                                                                                                                                                   |                              |
| 823 | In your opinion, if you knew that a shopkeeper or meal vendor was infected with HIV, do you continue to buy food from him?                                                        | 01= No<br>02= Yes<br><br>88= Refusal<br>99= Don't know                                                                                                                 | <input type="checkbox"/> <input type="checkbox"/> <input type="checkbox"/>                                                                                                                                                                                                                                                                                                                                                                                                                                                                                                                                                                   |                              |
| 824 | In your opinion, if someone in your family was infected with HIV, would you want it to remain a family secret?                                                                    | 01= No<br>02= Yes<br><br>88= Refusal<br>99= Don't know                                                                                                                 | <input type="checkbox"/> <input type="checkbox"/> <input type="checkbox"/>                                                                                                                                                                                                                                                                                                                                                                                                                                                                                                                                                                   |                              |
| 825 | In your opinion, if someone is infected with HIV, what do you recommend?                                                                                                          | 01=Go to Hospital/Clinic<br>02=Going to a VCDC<br>03=Enter Maternity<br>04=Get in touch with the PLHIV association<br>05=Consult a healer<br>06=Do nothing<br>07=Other | <input type="checkbox"/> <input type="checkbox"/> <input type="checkbox"/><br><input type="checkbox"/> <input type="checkbox"/> <input type="checkbox"/> |                              |
| 826 | Do you know of one or more places where it is possible to have a confidential test when you want to know if you have the AIDS virus?                                              | 01= No<br>02= Yes<br><br>88= Refusal<br>99= Don't know                                                                                                                 | <input type="checkbox"/> <input type="checkbox"/> <input type="checkbox"/>                                                                                                                                                                                                                                                                                                                                                                                                                                                                                                                                                                   | If 01, 88, 99 switch to Q828 |
| 827 | Where exactly?                                                                                                                                                                    | 01=CDV<br>02=Hospital/Clinic/CSPS<br>03=Pharmacy<br>04=Private Dispensary/Laboratory<br>05=Maternity<br>06=Resource persons (peer educators, etc.)<br>07=Other.....    | <input type="checkbox"/> <input type="checkbox"/> <input type="checkbox"/><br><input type="checkbox"/> <input type="checkbox"/> <input type="checkbox"/>                                                                               |                              |
| 828 | If you were offered an HIV self-test, would you accept it?<br><br>(You do the test yourself, and if the first result is positive you then go to a health center for confirmation) | 01= No<br>02= Yes<br><br>88= Refusal<br>99= Don't know                                                                                                                 | <input type="checkbox"/> <input type="checkbox"/> <input type="checkbox"/>                                                                                                                                                                                                                                                                                                                                                                                                                                                                                                                                                                   |                              |

**Section 9. ALCOHOL AND DRUGS**

**Now, I would like to ask you a few questions about the drug or substances that you may have used. Please remember that your answers are private and we will not share what you are going to tell us with anyone else.**

|     |                                                                                                                                                                                                                                                              |                                                                                                                              |     |                                 |
|-----|--------------------------------------------------------------------------------------------------------------------------------------------------------------------------------------------------------------------------------------------------------------|------------------------------------------------------------------------------------------------------------------------------|-----|---------------------------------|
| 901 | Have you ever injected illicit drugs (e.g., cocaine, heroin) or narcotics just for entertainment and not for treatment? (the drug was not prescribed as a medicine or for health reasons, but you injected it for pleasure, enjoyment, or a great sensation) | 01= No<br>02= Yes, in the last 6 months<br>03= Yes, but <u>not</u> in the last 6 months<br><br>88= Refusal<br>99= Don't know | _ _ | SI 01, 88 or 99, switch to Q805 |
| 902 | Where do you get the syringes to inject illegal drugs or the drugs prescribed to distract you ? I will read you a list. For each of the options please say if this is a route for you to get your syringes.                                                  |                                                                                                                              |     |                                 |
|     | 902a = Health Care Worker/Professional                                                                                                                                                                                                                       | 01= No<br>02= Yes<br><br>88= Refusal<br>99= Don't know                                                                       | _ _ |                                 |
|     | 902b = Pharmacy or other store                                                                                                                                                                                                                               | 01= No<br>02= Yes<br><br>88= Refusal<br>99= Don't know                                                                       | _ _ |                                 |
|     | 902c = One NGO/Association                                                                                                                                                                                                                                   | 01= No<br>02= Yes<br><br>88= Refusal<br>99= Don't know                                                                       | _ _ |                                 |
|     | 902d = Spouse or sexual partner                                                                                                                                                                                                                              | 01= No<br>02= Yes<br><br>88= Refusal<br>99= Don't know                                                                       | _ _ |                                 |
|     | 902e = Friend/family member                                                                                                                                                                                                                                  | 01= No<br>02= Yes<br><br>88= Refusal<br>99= Don't know                                                                       | _ _ |                                 |
|     | 902f = I find them on the street or in garbage cans                                                                                                                                                                                                          | 01= No<br>02= Yes<br><br>88= Refusal<br>99= Don't know                                                                       | _ _ |                                 |
|     | 902g = Other (specify)                                                                                                                                                                                                                                       | 01= No<br>02= Yes<br>Specify: _____<br><br>88= Refusal<br>99= Don't know                                                     | _ _ |                                 |
| 903 | When you use a syringe to inject a drug or substance (for any reason), have you ever <u>shared your</u> used syringe(s) with another person?                                                                                                                 | 01= No<br>02= Yes, in the last 6 months<br>03= Yes, but <u>not</u> in the last 6 months<br><br>88= Refusal                   | _ _ |                                 |



|                                                                        |                                                                                                                                                                                                                                                                                                                                                                                                                                                                                                                                                                                               |                                                                                                                                                                      |                                               |                                      |
|------------------------------------------------------------------------|-----------------------------------------------------------------------------------------------------------------------------------------------------------------------------------------------------------------------------------------------------------------------------------------------------------------------------------------------------------------------------------------------------------------------------------------------------------------------------------------------------------------------------------------------------------------------------------------------|----------------------------------------------------------------------------------------------------------------------------------------------------------------------|-----------------------------------------------|--------------------------------------|
|                                                                        |                                                                                                                                                                                                                                                                                                                                                                                                                                                                                                                                                                                               | 99= Don't know                                                                                                                                                       |                                               |                                      |
| 904                                                                    | When you use a syringe to inject something into yourself (for whatever reason), have you ever used a syringe that someone else had already used?                                                                                                                                                                                                                                                                                                                                                                                                                                              | 01= No<br>02= Yes, in the last 6 months<br>03= Yes, but <u>not</u> in the last 6 months<br><br>88= Refusal<br>99= Don't know                                         | [[[                                           |                                      |
| 905                                                                    | To your knowledge, is there one or more of your sexual partners (male or female) who use syringes to inject drugs?                                                                                                                                                                                                                                                                                                                                                                                                                                                                            | 01= No<br>02= Yes, in the last 6 months<br>03= Yes, but <u>not</u> in the last 6 months<br><br>88= Refusal<br>99= Don't know                                         | [[[                                           |                                      |
| 906                                                                    | Have you ever used a non-injection drug or drug that was not prescribed to you for health reasons?                                                                                                                                                                                                                                                                                                                                                                                                                                                                                            | 01= No<br>02= Yes, in the last 6 months<br>03= Yes, but <u>not</u> in the last 6 months<br><br>88= Refusal<br>99= Don't know                                         | [[[                                           |                                      |
| 907                                                                    | Which of the following drugs have you used?<br><br><i>Read the terms and conditions, write '1' each time an answer is quoted</i><br><br><b>Several answers are possible</b>                                                                                                                                                                                                                                                                                                                                                                                                                   | 01=Indian Hemp<br>02=Amphetamines<br>03=Cocaine<br>04=Heroin<br>05=Dissolution<br>06=Crack<br>07=Traditional Potion<br>08=Other                                      | [[[<br>[[[<br>[[[<br>[[[<br>[[[<br>[[[<br>[[[ |                                      |
| Now, I would like to ask you a few questions about alcohol consumption |                                                                                                                                                                                                                                                                                                                                                                                                                                                                                                                                                                                               |                                                                                                                                                                      |                                               |                                      |
| 908                                                                    | In the <u>past 30 days</u> , how many days have you had at least one drink of alcohol?                                                                                                                                                                                                                                                                                                                                                                                                                                                                                                        | <i>[Note the number of days]</i><br><br>88= Refusal<br>99= Don't know                                                                                                | [[[                                           | <i>If 00, go to the next section</i> |
| 909                                                                    | Of all those days when you drank alcohol, how many days did you <u>drink 5 or more drinks</u> on the spot?<br>Consumption is equivalent to: <ul style="list-style-type: none"> <li>• A 33 cl glass or can or a small bottle of beer</li> <li>• 2 bottles of 66 cl of BRAKINA, SOBBRA, Flag, Castel, Beaufort, Etc. [or the big bottle of beer]</li> <li>• A 5cl glass or a cup of Whisky or vodka</li> <li>• A glass of wine 10cl</li> </ul> <i>[Investigator Verification: This answer should not be higher than the 6.50 response. If so, ask these two questions again to understand.]</i> | <i>[Note the number of days, including 00 if the person has not had 5 or more drinks on site every day in the last 30 days]</i><br><br>88= Refusal<br>99= Don't know | [[[                                           |                                      |

|     |                                                                                                                                                                                                                                                                                                                                                                                                                                                            |                                                                                                                                                                          |                                                                |  |
|-----|------------------------------------------------------------------------------------------------------------------------------------------------------------------------------------------------------------------------------------------------------------------------------------------------------------------------------------------------------------------------------------------------------------------------------------------------------------|--------------------------------------------------------------------------------------------------------------------------------------------------------------------------|----------------------------------------------------------------|--|
| 910 | <p>Approximately how many glasses of alcohol do you consume in a typical day or night when you drink?</p> <p>Consumption is equivalent to:</p> <ul style="list-style-type: none"> <li>• A 33 cl glass or can or a small bottle of beer</li> <li>• 2 bottles of 66 cl of BRAKINA, SOBBRA, Flag, Castel, Beaufort, Etc. [or the big bottle of beer]</li> <li>•</li> <li>• A 5cl glass or a cup of Whisky or vodka</li> <li>• A glass of wine 10cl</li> </ul> | <p>[Note the number (e.g.: 04 for 4 drinks. If a respondent consumed three 33 cl bottles of beer and 100 ml of wine, mark 04)]</p> <p>88= Refusal<br/>99= Don't know</p> | <input type="text"/> <input type="text"/> <input type="text"/> |  |
|-----|------------------------------------------------------------------------------------------------------------------------------------------------------------------------------------------------------------------------------------------------------------------------------------------------------------------------------------------------------------------------------------------------------------------------------------------------------------|--------------------------------------------------------------------------------------------------------------------------------------------------------------------------|----------------------------------------------------------------|--|

### SECTION 10. EXPOSURE TO INTERVENTIONS

| No.   | Questions                                                                 | Codes                                                                                                                                                           | Response Codes       | Jump                             |
|-------|---------------------------------------------------------------------------|-----------------------------------------------------------------------------------------------------------------------------------------------------------------|----------------------|----------------------------------|
| 1001  | Have you benefited from condoms distributed in the last 3 months?         | 01= No<br>02= Yes                                                                                                                                               | <input type="text"/> |                                  |
| 1002  | Have you benefited from any gels distributed in the last 3 months?        | 01= No<br>02= Yes                                                                                                                                               | <input type="text"/> |                                  |
| 1003  | Have you been tested for STIs in the last three months?                   | 01= No<br>02= Yes                                                                                                                                               | <input type="text"/> |                                  |
| 1004  | Do you know of a place where you can get tested for HIV?                  | 01= No<br>02= Yes                                                                                                                                               | <input type="text"/> |                                  |
| 1005a | Have you been tested for HIV?                                             | 1 = Yes<br>2 = No                                                                                                                                               | <input type="text"/> | <b>If 2, go to 1008</b>          |
| 1005b | If so, when was the last time you were tested for HIV?                    | 1= In the last 3 months<br>2= More than 3 months ago and less than 6 months ago<br>3=More than 6 months ago and less than a year ago<br>4= More than a year ago | <input type="text"/> |                                  |
| 1005c | The last time you were tested for HIV, did you receive your test results? | 1 = Yes<br>2 = No                                                                                                                                               | <input type="text"/> | <b>If 2, go to 1008</b>          |
| 1005d | What was the result of the test                                           | 1 = positive<br>2 = negative<br>3 = indeterminate<br>9 = Non-response                                                                                           | <input type="text"/> | <b>If 2, 3 or 9, go to 1008</b>  |
| 1006a | Are you on ARV treatments?                                                | 1 = Yes<br>2 = No                                                                                                                                               | <input type="text"/> |                                  |
| 1006b | Do you regularly think about the ARV                                      | 1 = Yes<br>2 = No                                                                                                                                               | <input type="text"/> |                                  |
| 1007a | Have you ever had a viral load measurement?                               | 1 = Yes<br>2 = No<br>8 = Don't know<br>9 = Non-response                                                                                                         | <input type="text"/> | <b>If 2 or 8 or 9 go to 1008</b> |
| 1007b | When was your last viral load measurement                                 | 1= In the last 3 months<br>2= More than 3 months ago and less than 6 months ago<br>3=More than 6 months ago and less than a year ago<br>4= More than a year ago | <input type="text"/> |                                  |
| 1007c | What was the result of your last viral load measurement?                  | 1 = Undetectable<br>2 = high: value:                                                                                                                            | <input type="text"/> |                                  |
|       |                                                                           | 01=Radio                                                                                                                                                        | <input type="text"/> |                                  |

| No.   | Questions                                                                                                     | Codes                                                                                                                                                                                                                                    | Response Codes                                                                                                                                                                                                                                           | Jump                                 |
|-------|---------------------------------------------------------------------------------------------------------------|------------------------------------------------------------------------------------------------------------------------------------------------------------------------------------------------------------------------------------------|----------------------------------------------------------------------------------------------------------------------------------------------------------------------------------------------------------------------------------------------------------|--------------------------------------|
| 1008  | In the past 6 months, have you heard or watched anything about HIV or AIDS from the following sources?        | 02=Television<br>03=Posters<br>04=Flyer<br>05=Friends/Relatives<br>06=Teacher<br>07=Church/Mosque<br>08=Health worker<br>09=Other, specify _____<br>88=Don't know<br>99=No response                                                      | <input type="checkbox"/><br><input type="checkbox"/><br><input type="checkbox"/><br><input type="checkbox"/><br><input type="checkbox"/><br><input type="checkbox"/><br><input type="checkbox"/><br><input type="checkbox"/>                             |                                      |
| 10010 | In the past six months, have you talked about HIV or STIs with a "peer educator"?                             | 01= No<br>02= Yes<br>88= Refusal<br>99= Don't know                                                                                                                                                                                       | <input type="checkbox"/><br><input type="checkbox"/>                                                                                                                                                                                                     | <b>If 01, 88 or 99, go to Q1011</b>  |
| 1010  | What did the "peer educator" talk about?<br><br>(several answers possible)<br><br><u>Not reading the list</u> | 01=Ways and means to avoid HIV infection<br>02=HIV transmission routes<br>03=Correct use of condoms<br>04=The location of an STI clinic<br>05=Place of care<br>06=Family planning<br>07=Other _____<br>88=I don't know<br>99=No response | <input type="checkbox"/><br><input type="checkbox"/><br><input type="checkbox"/><br><input type="checkbox"/><br><input type="checkbox"/><br><input type="checkbox"/><br><input type="checkbox"/><br><input type="checkbox"/><br><input type="checkbox"/> |                                      |
| 1011  | At your workplace, have you seen or heard anything about HIV prevention?                                      | 01= No<br>02= Yes                                                                                                                                                                                                                        | <input type="checkbox"/><br><input type="checkbox"/>                                                                                                                                                                                                     | <b>If 01, go to the next section</b> |
| 1012  | What did you see or hear?<br><br><u>Not reading the list</u><br><br><b>Circle all the answers mentioned</b>   | 01=HIV/STI Posters<br>02=HIV/STI flyer<br>03=A fellow educator talking about HIV/STIs<br>04=A health worker from a clinic Talking about HIV/STIs<br>05=Condoms<br>06=Other _____<br>88=I don't know<br>99=No response                    | <input type="checkbox"/><br><input type="checkbox"/><br><input type="checkbox"/><br><input type="checkbox"/><br><input type="checkbox"/><br><input type="checkbox"/><br><input type="checkbox"/><br><input type="checkbox"/>                             |                                      |

## Section 1<sup>2</sup>.HUMAN RIGHTS, STIGMATIZATION AND VIOLENCE

"Now we're going to ask you questions about how you've felt or been treated by other people because you're doing sex work. Please don't feel embarrassed to answer because there is no right or wrong answer, and we won't tell anyone about what you're going to tell us. "

|      | COMMUNITY                                                                   | Coding                                                 |                                                      |  |
|------|-----------------------------------------------------------------------------|--------------------------------------------------------|------------------------------------------------------|--|
| 1101 | Have you ever felt excluded from family gatherings because you do sex work? | 01= No<br>02= Yes<br><br>88= Refusal<br>99= Don't know | <input type="checkbox"/><br><input type="checkbox"/> |  |

|      |                                                                                                                                            |                                                                                                                     |                          |  |
|------|--------------------------------------------------------------------------------------------------------------------------------------------|---------------------------------------------------------------------------------------------------------------------|--------------------------|--|
| 1102 | Have you ever <u>felt</u> that family members have made discriminatory remarks or gossiped about you because you are involved in sex work? | 01= No<br>02= Yes<br>88= Refusal<br>99= Don't know                                                                  | <input type="checkbox"/> |  |
| 1103 | Have you ever <u>felt</u> rejected by <u>your friends</u> because you do sex work?                                                         | 01= No<br>02= Yes<br>88= Refusal<br>99= Don't know                                                                  | <input type="checkbox"/> |  |
| 1104 | Have you ever <u>lost</u> a job or been fired (other than sex work) because you do sex work??                                              | 01= None<br>02= Yes<br>03= Not applicable, has never had a job outside of sex work<br>88= Refusal<br>99= Don't know | <input type="checkbox"/> |  |

|                      |                                                                                                                                                                            |                                                                                                                                  |                          |                                  |
|----------------------|----------------------------------------------------------------------------------------------------------------------------------------------------------------------------|----------------------------------------------------------------------------------------------------------------------------------|--------------------------|----------------------------------|
| 1105                 | Have you ever been <u>denied</u> education/training opportunities, such as access to school?<br>Because you do sex work?                                                   | 01= No<br>02= Yes<br>03= Not applying, never tried to go to school or never learned a trade<br><br>88= Refusal<br>99= Don't know | <input type="checkbox"/> |                                  |
| 1106                 | Are there <u>safe</u> places in Ouagadougou (or Bobo Dioulasso) where you can meet with other sex workers? (for example: an association, at a friend's house, group, etc.) | 01= No<br>02= Yes<br><br>88= Refusal<br>99= Don't know                                                                           | <input type="checkbox"/> |                                  |
| <b>HEALTH SYSTEM</b> |                                                                                                                                                                            |                                                                                                                                  |                          |                                  |
| 1107                 | Have you ever been <u>afraid</u> to go to health services because you're worried that someone will find out that you're doing sex work?                                    | 01= No<br>02= Yes<br><br>88= Refusal<br>99= Don't know                                                                           | <input type="checkbox"/> |                                  |
| 1108                 | Have you ever <u>avoided</u> going to health services because you're worried that someone will find out you're doing sex work?                                             | 01= No<br>02= Yes<br><br>88= Refusal<br>99= Don't know                                                                           | <input type="checkbox"/> |                                  |
| 1109                 | Have you ever been <u>denied</u> health care (or prevented from receiving health care) because you are engaged in sex work?                                                | 01= No<br>02= Yes<br><br>88= Refusal<br>99= Don't know                                                                           | <input type="checkbox"/> |                                  |
| 1110                 | Have you ever felt mistreated in health services because someone knows you're doing sex work?                                                                              | 01= No<br>02= Yes<br><br>88= Refusal<br>99= Don't know                                                                           | <input type="checkbox"/> |                                  |
| 1111                 | Have you <u>ever had</u> difficulty accessing health services because you are involved in sex work?                                                                        | 01= No<br>02= Yes<br><br>88= Refusal<br>99= Don't know                                                                           | <input type="checkbox"/> |                                  |
| 1112                 | Have you <u>ever heard</u> health professionals gossip (talk about you) because you do sex work?                                                                           | 01= No<br>02= Yes<br><br>88= Refusal<br>99= Don't know                                                                           | <input type="checkbox"/> |                                  |
| 1113                 | Have you <u>been tested</u> for HIV without want to or without consent?                                                                                                    | 01= No<br>02= Yes<br><br>88= Refusal<br>99= Don't know                                                                           | <input type="checkbox"/> | If 01, 88, or 99, change to 1115 |
| 1114                 | If so, were you forced or coerced to take the HIV test because you are doing sex work?                                                                                     | 01= No<br>02= Yes<br><br>88= Refusal<br>99= Don't know                                                                           | <input type="checkbox"/> |                                  |

|      | COMPANY                                                                                                                                               |                                                                                             |                          |                                  |
|------|-------------------------------------------------------------------------------------------------------------------------------------------------------|---------------------------------------------------------------------------------------------|--------------------------|----------------------------------|
| 1115 | Have you <u>ever felt</u> that the police have denied you protection because you are doing sex work?                                                  | 01= No<br>02= Yes<br><br>88= Refusal<br>99= Don't know                                      | <input type="checkbox"/> |                                  |
| 1116 | Have you <u>ever avoided</u> taking condoms with you because you're afraid of getting into trouble with the police?                                   | 01= No<br>02= Yes<br><br>88= Refusal<br>99= Don't know                                      | <input type="checkbox"/> |                                  |
| 1117 | Have you <u>ever refused</u> to take condoms with peer educators/community workers because you were afraid of getting into trouble with the police?   | 01= No<br>02= Yes<br><br>88= Refusal<br>99= Don't know                                      | <input type="checkbox"/> |                                  |
| 1118 | In general, how would you describe your relationship with the police?                                                                                 | 01= Poor<br>02= Neutral (neither good nor bad)<br>03= Good<br>88= Refusal<br>99= Don't know | <input type="checkbox"/> |                                  |
| 1119 | Have you <u>ever been harassed</u> or intimidated by the police because you do sex work?                                                              | 01= No<br>02= Yes<br><br>88= Refusal<br>99= Don't know                                      | <input type="checkbox"/> |                                  |
| 1120 | Has a police officer <u>ever taken</u> condoms away from you to destroy, throw them in the trash or throw them away?                                  | 01= No<br>02= Yes<br><br>88= Refusal<br>99= Don't know                                      | <input type="checkbox"/> | If 01, 88, or 99, change to 1123 |
|      | <b>2.21</b> Thinking about the <u>last time</u> the police took away condoms from you, did you engage in sex work during the day or night? Following? | 01= No<br>02= Yes<br><br>88= Refusal<br>99= Don't know                                      | <input type="checkbox"/> | If 01, 88, or 99, change to 1123 |
|      | <b>2.22</b> If so, have you used a condom at this time? Time?                                                                                         | 01= No<br>02= Yes<br><br>88= Refusal<br>99= Don't know                                      | <input type="checkbox"/> |                                  |
| 1123 | Have you <u>ever witnessed</u> (i.e., seen) condoms held by a sex worker or peer educator/social worker being confiscated or destroyed by the police? | 01= No<br>02= Yes<br><br>88= Refusal<br>99= Don't know                                      | <input type="checkbox"/> |                                  |
| 1124 | Have you <u>ever heard</u> of incidents where police have confiscated or destroyed condoms held by sex workers or peer educators/social care workers? | 01= No<br>02= Yes<br><br>88= Refusal<br>99= Don't know                                      | <input type="checkbox"/> |                                  |

|      |                                                                                                                                |                                                        |                          |                                           |
|------|--------------------------------------------------------------------------------------------------------------------------------|--------------------------------------------------------|--------------------------|-------------------------------------------|
| 1125 | Have you <u>ever been</u> arrested?<br><i>[Investigate: specified here 'stop' is different from 'in prison'—question 2.27]</i> | 01= No<br>02= Yes<br><br>88= Refusal<br>99= Don't know | <input type="checkbox"/> | If 01, 88,<br>or 99,<br>change to<br>1129 |
|------|--------------------------------------------------------------------------------------------------------------------------------|--------------------------------------------------------|--------------------------|-------------------------------------------|

|      |                                                                                                                                                                    |                                                                                                                                          |                          |                                  |
|------|--------------------------------------------------------------------------------------------------------------------------------------------------------------------|------------------------------------------------------------------------------------------------------------------------------------------|--------------------------|----------------------------------|
| 1126 | Have you ever been arrested for sex work-related reasons?                                                                                                          | 01= No<br>02= Yes, in the last 12 months<br>03= Yes, but not in the last 12 months<br><br>88= Refusal<br>99= Don't know                  | <input type="checkbox"/> |                                  |
| 1127 | Have you <u>ever been</u> in prison?                                                                                                                               | 01= No<br>02= Yes<br><br>88= Refusal<br>99= Don't know                                                                                   | <input type="checkbox"/> | If 01, 88, or 99, change to 1129 |
| 1128 | When you were in prison, was it for reasons related to sex work or for other similar reasons?                                                                      | 01= No<br>02= Yes, and it was in the last 12 months<br>03= Yes, but it wasn't in the last 12 months<br><br>88= Refusal<br>99= Don't know | <input type="checkbox"/> |                                  |
| 1129 | Have you ever <u>been afraid</u> to walk around in public places because you practice sex work?                                                                    | 01= No<br>02= Yes<br><br>88= Refusal<br>99= Don't know                                                                                   | <input type="checkbox"/> |                                  |
| 1130 | Have you ever <u>been verbally harassed</u> and you think it was because you do sex work?                                                                          | 01= No<br>02= Yes<br><br>88= Refusal<br>99= Don't know                                                                                   | <input type="checkbox"/> |                                  |
| 1131 | Have you ever been <u>blackmailed</u> for doing sex work?                                                                                                          | 01= No<br>02= Yes<br><br>88= Refusal<br>99= Don't know                                                                                   | <input type="checkbox"/> |                                  |
| 1132 | Have you ever been physically assaulted (violently pushed, shoved, slapped, hit, suffocated, or physically injured)?                                               | 01= No<br>02= Yes<br><br>88= Refusal<br>99= Don't know                                                                                   | <input type="checkbox"/> | If 01, 88, or 99, change to 1137 |
| 1133 | Was it before or after you started doing sex work?                                                                                                                 | 01=Before<br>02=After<br>03=Before and After<br><br>88=Refusal<br>99=Don't know                                                          | <input type="checkbox"/> |                                  |
| 1134 | Approximately how many times have you been physically assaulted?                                                                                                   | <i>[Note the number of times]</i><br><br>88= Refusal<br>99= Don't know                                                                   | <input type="checkbox"/> |                                  |
| 1135 | Who was the person who physically assaulted you? I will read a list of options. For each, please tell me if this type of person has ever physically assaulted you. |                                                                                                                                          |                          |                                  |
|      | 1135a = Repeat customer                                                                                                                                            | 01= No<br>02= Yes<br><br>88= Refusal<br>99= Don't know                                                                                   | <input type="checkbox"/> |                                  |





|  |                                                                                           |                                                                          |                          |  |
|--|-------------------------------------------------------------------------------------------|--------------------------------------------------------------------------|--------------------------|--|
|  | <b>1135b</b> = Occasional or New Customer                                                 | 01= No<br>02= Yes<br><br>88= Refusal<br>99= Don't know                   | <input type="checkbox"/> |  |
|  | <b>1135c</b> = Spouse, boyfriend or any non-paying sexual partner (current or former)     | 01= No<br>02= Yes<br><br>88= Refusal<br>99= Don't know                   | <input type="checkbox"/> |  |
|  | <b>1135d</b> = Other sex worker                                                           | 01= No<br>02= Yes<br><br>88= Refusal<br>99= Don't know                   | <input type="checkbox"/> |  |
|  | <b>1135e</b> = Pimp, Chief (involved in sex work)                                         | 01= No<br>02= Yes<br><br>88= Refusal<br>99= Don't know                   | <input type="checkbox"/> |  |
|  | <b>1135f</b> = Uniformed personnel (police, military, security service)                   | 01= No<br>02= Yes<br><br>88= Refusal<br>99= Don't know                   | <input type="checkbox"/> |  |
|  | <b>1135g</b> = Teacher, classmate, friend (apart from boyfriend), co-workers, or employer | 01= No<br>02= Yes<br><br>88= Refusal<br>99= Don't know                   | <input type="checkbox"/> |  |
|  | <b>1135h</b> = Family member including father, mother, siblings, and others               | 01= No<br>02= Yes<br><br>88= Refusal<br>99= Don't know                   | <input type="checkbox"/> |  |
|  | <b>1135i</b> = Community or religious leaders                                             | 01= No<br>02= Yes<br><br>88= Refusal<br>99= Don't know                   | <input type="checkbox"/> |  |
|  | <b>1135d</b> = Someone in your neighborhood                                               | 01= No<br>02= Yes<br><br>88= Refusal<br>99= Don't know                   | <input type="checkbox"/> |  |
|  | <b>1135k</b> = An unknown                                                                 | 01= No<br>02= Yes<br><br>88= Refusal<br>99= Don't know                   | <input type="checkbox"/> |  |
|  | <b>1135l</b> = Other (specify)                                                            | 01= No<br>02= Yes<br>Specify: _____<br><br>88= Refusal<br>99= Don't know | <input type="checkbox"/> |  |

|             |                                                                                                                                                                                       |                                                                                                                               |                          |                                            |
|-------------|---------------------------------------------------------------------------------------------------------------------------------------------------------------------------------------|-------------------------------------------------------------------------------------------------------------------------------|--------------------------|--------------------------------------------|
| <b>1136</b> | Do you think that these experiences of physical violence are related to the fact that you have practiced sex work?                                                                    | 01= No<br>02= Yes, but not all<br>03= Yes, all of them (or the only experience I've had)<br><br>88= Refusal<br>99= Don't know | <input type="checkbox"/> |                                            |
| <b>1137</b> | Have you <u>ever been</u> tortured?                                                                                                                                                   | 01= No<br>02= Yes<br><br>88= Refusal<br>99= Don't know                                                                        | <input type="checkbox"/> | If 01, 88, or 99, change to 1139           |
| 1138        | If so, do you think it is related to the fact that you are doing sex work?                                                                                                            | 01= No<br>02= Yes<br><br>88= Refusal<br>99= Don't know                                                                        | <input type="checkbox"/> |                                            |
| <b>1139</b> | Have you ever been forced to have sex when you don't want to? (By forced, I mean physically forced, coerced into having sex, or penetration with an object, while you don't want to)? | 01= No<br>02= Yes<br><br>88= Refusal<br>99= Don't know                                                                        | <input type="checkbox"/> | If 01, 88, or 99, skip to the next section |
| <b>1140</b> | Was it before or after you started doing sex work?                                                                                                                                    | 01=Before<br>02=After<br>03=Before and After<br><br>88= Refusal<br>99= Don't know                                             | <input type="checkbox"/> |                                            |
| <b>1141</b> | Approximately, how many times have you been forced to have sex?                                                                                                                       | <i>[Note the number of times]</i><br><br>88= Refusal<br>99= Don't know                                                        | <input type="checkbox"/> |                                            |
| <b>1142</b> | Who was the person who forced you to have sex? I will read a list of options. For Each, please tell me if this type of person has ever forced you to have sex?.                       |                                                                                                                               |                          |                                            |
|             | <b>1142a</b> = Repeat customer                                                                                                                                                        | 01= No<br>02= Yes<br><br>88= Refusal<br>99= Don't know                                                                        | <input type="checkbox"/> |                                            |
|             | <b>1142b</b> = Occasional or New Customer                                                                                                                                             | 01= No<br>02= Yes<br><br>88= Refusal<br>99= Don't know                                                                        | <input type="checkbox"/> |                                            |
|             | <b>1142c</b> = Current or former spouse, boyfriend, or any sexual partner                                                                                                             | 01= No<br>02= Yes<br><br>88= Refusal<br>99= Don't know                                                                        | <input type="checkbox"/> |                                            |
|             | <b>1142d</b> = Other sex worker                                                                                                                                                       | 01= No<br>02= Yes<br><br>88= Refusal<br>99= Don't know                                                                        | <input type="checkbox"/> |                                            |

|             |                                                                                                                               |                                                                                                                                                  |                          |  |
|-------------|-------------------------------------------------------------------------------------------------------------------------------|--------------------------------------------------------------------------------------------------------------------------------------------------|--------------------------|--|
|             | <b>1142e</b> = Pimp, Chief (involved in sex work)                                                                             | 01= No<br>02= Yes<br><br>88= Refusal<br>99= Don't know                                                                                           | <input type="checkbox"/> |  |
|             | <b>1142f</b> = Uniforms (police, military, security service)                                                                  | 01= No<br>02= Yes<br><br>88= Refusal<br>99= Don't know                                                                                           | <input type="checkbox"/> |  |
|             | <b>1142g</b> = Teacher, classmate, friend (apart from boyfriend), co-workers, or your employer (not involved in sex work)     | 01= No<br>02= Yes<br><br>88= Refusal<br>99= Don't know                                                                                           | <input type="checkbox"/> |  |
|             | <b>1142h</b> = Family member including father, mother, siblings, and others                                                   | 01= No<br>02= Yes<br><br>88= Refusal<br>99= Don't know                                                                                           | <input type="checkbox"/> |  |
|             | <b>1142i</b> = Community or religious leaders                                                                                 | 01= No<br>02= Yes<br><br>88= Refusal<br>99= Don't know                                                                                           | <input type="checkbox"/> |  |
|             | <b>1142d</b> = Someone in your neighborhood                                                                                   | 01= No<br>02= Yes<br><br>88= Refusal<br>99= Don't know                                                                                           | <input type="checkbox"/> |  |
|             | <b>1142k</b> = Unknown                                                                                                        | 01= No<br>02= Yes<br><br>88= Refusal<br>99= Don't know                                                                                           | <input type="checkbox"/> |  |
|             | <b>1142l</b> = Other (specify)                                                                                                | 01= No<br>02= Yes<br>Specify:<br><br>88= Refusal<br>99= Don't know                                                                               | <input type="checkbox"/> |  |
| <b>1143</b> | Do you believe that one or more of these experiences of sexual violence were related to the fact that you are doing sex work? | 01= No<br>02= Yes, but not all<br>03= Yes, all of them (or the only experience of sexual violence I've had)<br><br>88= Refusal<br>99= Don't know | <input type="checkbox"/> |  |
| <b>1144</b> | Approximately, how old were you the first time you were forced to have sex? (age in completed years)                          | <i>[Note age in completed years]</i><br><br>88= Refusal<br>99= Don't know                                                                        | <input type="checkbox"/> |  |

|                    |                                                                                                   |                                                                                                                                                                                                                                                                                                                                             |                                     |
|--------------------|---------------------------------------------------------------------------------------------------|---------------------------------------------------------------------------------------------------------------------------------------------------------------------------------------------------------------------------------------------------------------------------------------------------------------------------------------------|-------------------------------------|
| <p><b>1145</b></p> | <p>Has the person(s) who forced you to have sex been arrested by the police for this misdeed?</p> | <p>01= No, none of the culprits have ever been arrested<br/>                 02= Yes, all the culprits have been arrested<br/>                 03= Yes, but not all the culprits<br/>                 04= Other (specify)<br/>                 Specify: _____<br/><br/>                 88= Refusal<br/>                 99= Don't know</p> | <p>  <input type="checkbox"/>  </p> |
| <p><b>1146</b></p> | <p>When was the <u>last time</u> you were forced to have sex?</p>                                 | <p>01= Less than 12 months<br/>                 02= More than 12 months<br/><br/>                 88= Refusal<br/>                 99= Don't know</p>                                                                                                                                                                                       | <p>  <input type="checkbox"/>  </p> |
